# Supplementary material for: A recent bottleneck of Y chromosome diversity coincides with a global change in culture
Source: PubMed Central journal article supplement — Genome Res. 2015 Apr;25(4):459–66. doi: 10.1101/gr.186684.114 (PMC4381518; doi:10.1101/gr.186684.114), 2015-04
Supplement: supp_gr.186684.114_Supplemental_Tables_S1-S7.pdf [file supp_gr.186684.114_Supplemental_Tables_S1-S7.pdf]

**Table S1. Population names and geographic origin of Y chromosome samples used in this study.**

| <b>Region/Population</b>                 | <b>N</b> | <b>Country</b> | <b>Lat</b> | <b>Long</b> | <b>Source</b>          |
|------------------------------------------|----------|----------------|------------|-------------|------------------------|
| <b>Africa (N=26)</b>                     |          |                |            |             |                        |
| Baka-Pygmies                             | 3        | Cameroon       | 2.9        | 14.3        | (Lachance et al. 2012) |
| Bakola-Pygmies                           | 1        | Cameroon       | 2.9        | 14.3        | (Lachance et al. 2012) |
| Bedzan-Pygmies                           | 1        | Cameroon       | 2.9        | 14.3        | (Lachance et al. 2012) |
| Congo-Pygmies                            | 3        | Congo          | 0.9        | 15.9        | This study             |
| Hadza                                    | 5        | Tanzania       | -3.7       | 35.1        | (Lachance et al. 2012) |
| Luhya                                    | 3        | Kenya          | 0.6        | 34.8        | (Drmanac et al. 2010)  |
| Maasai                                   | 2        | Kenya          | -1.3       | 35.3        | (Drmanac et al. 2010)  |
| Sandawe                                  | 5        | Tanzania       | -4.9       | 35.8        | (Lachance et al. 2012) |
| Yoruba                                   | 3        | Nigeria        | 7.4        | 3.9         | (Drmanac et al. 2010)  |
| <b>Near East and the Caucasus (N=45)</b> |          |                |            |             |                        |
| Abkhazians                               | 2        | Georgia        | 43.1       | 40.6        | This study             |
| Arab-Christian                           | 3        | Israel         | 32.9       | 35.3        | This study             |
| Arab-Muslim                              | 2        | Israel         | 32.8       | 35.2        | This study             |
| Arabs                                    | 2        | Saudi Arabia   | 33.8       | 35.6        | This study             |
| Armenians                                | 6        | Armenia        | 40.2       | 44.5        | This study             |
| Assyrians                                | 3        | Armenia        | 40.1       | 44          | This study             |
| Avars                                    | 2        | Russia         | 42.2       | 47          | This study             |
| Azerbaijanis                             | 2        | Azerbaijan     | 40.1       | 47.5        | This study             |
| Balkars                                  | 1        | Russia         | 43.7       | 44.2        | This study             |
| Circassians                              | 2        | Russia         | 44.7       | 40          | This study             |
| Druze                                    | 2        | Israel         | 32.8       | 35.2        | This study             |
| Georgians                                | 1        | Georgia        | 43         | 41.4        | This study             |
| Georgians-Imeretins                      | 1        | Georgia        | 41.8       | 44.7        | This study             |
| Iranians                                 | 4        | Iran           | 35.1       | 51.2        | This study             |
| Jordanians                               | 2        | Jordan         | 31.9       | 35.9        | This study             |
| Kabardins                                | 2        | Russia         | 43.5       | 43.6        | This study             |
| Kumyks                                   | 1        | Russia         | 43         | 47.5        | This study             |
| Lebanese                                 | 1        | Lebanon        | 33.8       | 35.6        | This study             |
| Lezgins                                  | 2        | Russia         | 41.6       | 48.3        | This study             |
| North-Ossetians                          | 2        | Russia         | 43.2       | 43.9        | This study             |
| Tabasarans                               | 2        | Russia         | 42         | 47.9        | This study             |
| <b>Europe (N=81)</b>                     |          |                |            |             |                        |
| Albanians                                | 3        | Albania        | 41.3       | 19.8        | This study             |
| Baptized-Tatars                          | 1        | Russia         | 55.9       | 51.2        | This study             |
| Bashkirs                                 | 2        | Russia         | 51.9       | 58.2        | This study             |
| Belarusians                              | 3        | Belarus        | 52.2       | 24.4        | This study             |
| Central-Russians                         | 3        | Russia         | 57.8       | 28.3        | This study             |
| Chuvashes                                | 1        | Russia         | 53.7       | 54.7        | This study             |

|                            |   |                    |      |      |                               |
|----------------------------|---|--------------------|------|------|-------------------------------|
| Zaporizhsky Cossacks       | 2 | Ukraine            | 47.8 | 35.2 | This study                    |
| Kuban Cossacks             | 2 | Russia             | 45   | 38.7 | This study                    |
| Croats                     | 3 | Bosnia-Herzegovina | 43.3 | 17.8 | This study                    |
| Estonians                  | 5 | Estonia            | 59   | 22.8 | This study                    |
| French                     | 1 | France             | 48.9 | 2.4  | Personal Genome Project (PGP) |
| Germans                    | 1 | Germany            | 52.5 | 10.1 | This study                    |
| Hungarians                 | 2 | Ukraine            | 48   | 24.3 | This study                    |
| Italians                   | 3 | Italy              | 43.6 | 11   | (Drmanac et al. 2010)         |
| Karelians                  | 3 | Russia             | 61.2 | 32.4 | This study                    |
| Komis                      | 2 | Russia             | 62.6 | 58   | This study                    |
| Latvians                   | 2 | Latvia             | 56.9 | 24.5 | This study                    |
| Lithuanians                | 1 | Lithuania          | 55.3 | 24   | This study                    |
| Maris                      | 3 | Russia             | 55.4 | 56   | This study                    |
| Mishar-Tatars              | 1 | Russia             | 54.8 | 51.4 | This study                    |
| Moldavians                 | 1 | Moldova            | 47.1 | 28.7 | This study                    |
| Mordvins                   | 3 | Russia             | 54.1 | 43.3 | This study                    |
| North-Russians             | 2 | Russia             | 64.7 | 43.4 | This study                    |
| NW-Europeans               | 5 | Europe             | 53.4 | 6.5  | (Drmanac et al. 2010)         |
| Poles                      | 1 | Poland             | 52.2 | 21   | PGP                           |
| Portuguese                 | 1 | Portugal           | 38.7 | -9   | PGP                           |
| Saami                      | 3 | Norway             | 69.9 | 25.2 | This study                    |
| Swedes                     | 2 | Sweden             | 59.4 | 18   | This study                    |
| Tatars                     | 2 | Russia             | 54.6 | 53.8 | This study                    |
| Udmurts                    | 3 | Russia             | 57.3 | 54.1 | This study                    |
| Ukrainians                 | 7 | Ukraine            | 51.5 | 31.4 | This study                    |
| Ukrainians                 | 2 | Ukraine            | 51.5 | 31.4 | PGP                           |
| British                    | 2 | United Kingdom     | 51.5 | -0.1 | PGP                           |
| Vepsas                     | 3 | Russia             | 61.4 | 34.8 | This study                    |
| <b>Central Asia (N=20)</b> |   |                    |      |      |                               |
| Ishkasim                   | 2 | Tajikistan         | 37   | 71.7 | This study                    |
| Rushan-Vanch               | 2 | Tajikistan         | 38.5 | 71.7 | This study                    |
| Shugnan                    | 1 | Tajikistan         | 37.5 | 72.4 | This study                    |
| Tajiks                     | 1 | Tajikistan         | 38.4 | 68.9 | This study                    |
| Kazakhs                    | 3 | Kazakhstan         | 47.5 | 61.5 | This study                    |
| Kyrgyz                     | 7 | Kyrgyzstan         | 42.2 | 77   | This study                    |
| Turkmens                   | 3 | Uzbekistan         | 42.6 | 58.9 | This study                    |
| Uzbek                      | 1 | Uzbekistan         | 41   | 70.9 | This study                    |
| <b>South Asia (N=25)</b>   |   |                    |      |      |                               |
| Asur                       | 1 | India              | 23.7 | 85.3 | This study                    |
| Baliya                     | 1 | India              | 14.7 | 77.6 | This study                    |
| Bengali                    | 1 | India              | 22.9 | 88.3 | This study                    |
| Brahmin                    | 2 | India              | 25.3 | 83.1 | This study                    |

|                                       |    |                  |      |        |                        |
|---------------------------------------|----|------------------|------|--------|------------------------|
| Bangladeshi                           | 2  | Bangladesh       | 23.7 | 90.4   | This study             |
| Gond                                  | 1  | India            | 22.2 | 79.9   | This study             |
| Gujaratis                             | 3  | India            | 23.5 | 72.8   | (Drmanac et al. 2010)  |
| Gupta                                 | 1  | India            | 25.5 | 82.9   | This study             |
| Ho                                    | 1  | India            | 24.1 | 84.2   | This study             |
| Kapu                                  | 1  | India            | 17.7 | 83.2   | This study             |
| Kol                                   | 1  | India            | 24.5 | 83.2   | This study             |
| Kshatriya                             | 1  | India            | 25.7 | 82.7   | This study             |
| Kurmi                                 | 1  | India            | 25.2 | 83     | This study             |
| Madhya-Pradesh                        | 1  | India            | 23.3 | 77.1   | This study             |
| Malayan                               | 1  | India            | 10.4 | 76.7   | This study             |
| Orissa                                | 1  | India            | 20.5 | 85.9   | This study             |
| Punjabi                               | 1  | India            | 17   | 75.9   | This study             |
| Nepalese                              | 2  | Nepal            | 26.8 | 87.3   | This study             |
| Santhal                               | 1  | India            | 22.8 | 85.7   | This study             |
| Thakur                                | 1  | India            | 27   | 77.2   | This study             |
| <b>East and Southeast Asia (N=42)</b> |    |                  |      |        |                        |
| Aeta                                  | 3  | Philippines      | 17.6 | 121    | This study             |
| Agta                                  | 3  | Philippines      | 17.8 | 121.2  | This study             |
| Bajo                                  | 4  | Indonesia        | -4   | 122.6  | This study             |
| Batak                                 | 3  | Philippines      | 10.5 | 119.5  | This study             |
| Burmese                               | 8  | Myanmar          | 16.4 | 95.9   | This study             |
| Chinese                               | 2  | China            | 32   | 120.3  | PGP                    |
| Dusun                                 | 3  | Brunei           | 4.8  | 114.6  | This study             |
| Han                                   | 1  | China            | 39.9 | 116.4  | (Drmanac et al. 2010)  |
| Igorot                                | 1  | Philippines      | 17.1 | 121    | This study             |
| Japanese                              | 1  | Japan            | 35.7 | 139.7  | (Drmanac et al. 2010)  |
| Lebbo                                 | 4  | Indonesia        | 1.7  | 117.2  | This study             |
| Murut                                 | 5  | Brunei           | 4.5  | 114.7  | This study             |
| Vietnamese                            | 4  | Vietnam          | 21   | 105.9  | This study             |
| <b>Oceania (N=6)</b>                  |    |                  |      |        |                        |
| Koinanbe                              | 3  | Papua New Guinea | -5.5 | 144.6  | This study             |
| Kosipe                                | 3  | Papua New Guinea | -8.5 | 147.2  | This study             |
| <b>Siberian and Mongolia (N=62)</b>   |    |                  |      |        |                        |
| Altai-Kizhi                           | 3  | Russia           | 51.3 | 85.4   | This study             |
| Altai-Telengit                        | 1  | Russia           | 50.8 | 88.3   | This study             |
| Buryats                               | 12 | Russia           | 53.8 | 102.8  | This study             |
| Chukchis                              | 2  | Russia           | 64.7 | 177.5  | (Clemente et al. 2014) |
| Eskimo                                | 2  | Russia           | 64.5 | -172.9 | (Clemente et al. 2014) |
| Evenks                                | 3  | Russia           | 58.9 | 128.7  | This study             |
| Evens                                 | 8  | Russia           | 65.3 | 130    | This study             |
| Kets                                  | 2  | Russia           | 62.5 | 86.3   | This study             |
| Koryaks                               | 12 | Russia           | 59.1 | 159.9  | (Clemente et al. 2014) |

|                     |     |           |       |       |            |
|---------------------|-----|-----------|-------|-------|------------|
| Forest-Nenets       | 1   | Russia    | 64.9  | 77.8  | This study |
| Tundra-Nenets       | 2   | Russia    | 67    | 78.2  | This study |
| Selkups             | 1   | Russia    | 65.7  | 87    | This study |
| Shor                | 1   | Russia    | 52.8  | 87.9  | This study |
| Tuvinians           | 2   | Russia    | 51.5  | 92.8  | This study |
| Yakuts              | 4   | Russia    | 62.3  | 132   | This study |
| Mongol-Khalkh       | 1   | Mongolia  | 45.7  | 106.3 | This study |
| Mongol-Khalkh       | 4   | Mongolia  | 43.5  | 104.3 | This study |
| Mongol-Zakhchin     | 1   | Mongolia  | 48    | 91.6  | This study |
| <b>Andes (N=13)</b> |     |           |       |       |            |
| Calchaquies         | 3   | Argentina | -25.1 | -66.2 | This study |
| Colla               | 8   | Argentina | -24.2 | -66.3 | This study |
| Wichí               | 2   | Argentina | -23.2 | -64.1 | This study |
| Total               | 320 |           |       |       |            |

### Samples not used in geographically explicit analyses (N=153)

#### Jews (N=18)

|                 |   |            |    |    |            |
|-----------------|---|------------|----|----|------------|
| Ashkenazi-Jews  | 2 | France     | NA | NA | This study |
| Cochin-Jews     | 1 | India      | NA | NA | This study |
| Ethiopian-Jews  | 1 | Ethiopia   | NA | NA | This study |
| Georgian-Jews   | 1 | Georgia    | NA | NA | This study |
| Iranian-Jews    | 1 | Iran       | NA | NA | This study |
| Iraqi-Jews      | 3 | Iraq       | NA | NA | This study |
| Kurdistan-Jews  | 1 | Iraq       | NA | NA | This study |
| Moroccan-Jews   | 1 | Morocco    | NA | NA | This study |
| Mumbai-Jews     | 2 | India      | NA | NA | This study |
| Turkey-Jews     | 1 | Turkey     | NA | NA | This study |
| Uzbekistan-Jews | 2 | Uzbekistan | NA | NA | This study |
| Yemenite-Jews   | 2 | Yemen      | NA | NA | This study |

#### Others (N=33)

|                                |   |             |       |       |                       |
|--------------------------------|---|-------------|-------|-------|-----------------------|
| African-Americans              | 3 | USA         |       |       | (Drmanac et al. 2010) |
| Australian                     | 2 | Australia   | -17.1 | 132.5 | This study            |
| CEPH-pedigree                  | 7 | Europe      | NA    | NA    | (Drmanac et al. 2010) |
| Estonian-pedigree (6 excluded) | 8 | Estonia     | 59    | 22.8  | This study            |
| Estonians                      | 2 | Estonia     | 59    | 22.8  | PGP                   |
| German duplicate sequence      | 1 | Germany     | 52.5  | 10.1  | This study            |
| Komi duplicate sequence        | 1 | Russia      | 62.6  | 58    | This study            |
| Latino/Hispanic                | 1 | Colombia    | NA    | NA    | PGP                   |
| Mbo                            | 2 | Cameroon    | 5.7   | 9.9   | This Study            |
| Mexicans                       | 2 | USA         | NA    | NA    | (Drmanac et al. 2010) |
| Murut duplicate sequence       | 1 | Brunei      | 4.5   | 114.7 | This study            |
| Puerto-Ricans                  | 2 | Puerto_Rico | NA    | NA    | (Drmanac et al. 2010) |
| Ukrainians duplicate sequence  | 1 | Ukraine     | 51.5  | 31.4  | PGP                   |

|                                                  |      |    |    |     |
|--------------------------------------------------|------|----|----|-----|
| <b>Geographic ancestry not known<br/>(N=102)</b> | N.A. | NA | NA | PGP |
|--------------------------------------------------|------|----|----|-----|

---

|       |     |                                             |  |  |
|-------|-----|---------------------------------------------|--|--|
| Total | 473 | (456 without 13 relatives and 4 duplicates) |  |  |
|-------|-----|---------------------------------------------|--|--|

Note: The total number of newly reported sequences, excluding 6 relatives and 3 duplicates, is 299, including 16 released under accession number PRJEB7258 (Clemente et al. 2014).

**Table S2. The effect of different quality filters on the number of Y chromosome SNPs in 475 male samples.** L - total length of chrY considered, including variable and non-variable positions; SNPs - total number of binary SNPs; Recurrent – number of SNPs that occur in at least three unique lineages; FS - average number of father – son differences in 24 Dutch father-son pairs, 6 Estonian father-son pairs and 1 brother-brother pair, including cases where father has an ancestral allele and the son or one of the brothers has a derived allele.

|                                                            | <b>L</b>         | <b>SNPs</b>   | <b>Recurrent</b> | <b>FS</b>   |
|------------------------------------------------------------|------------------|---------------|------------------|-------------|
| Without filters                                            | 59,373,566       | 82,306        | NA               | 180.26      |
| <5% no-calls or missing data per SNP                       | NA               | 59,116        | 29,171           | 30.1        |
| <b>Effect of additional filters</b>                        |                  |               |                  |             |
| a. >5x unique sequence coverage in >95% individuals filter | 46,367,847       | 52,341        | 2,190            | 24.1        |
| b. Chr X normalized coverage filter                        | 12,315,045       | 47,868        | 1,475            | 12.2        |
| c. regional exclusion mask                                 | 10,793,302       | 42,340        | 948              | 3.26        |
| d. re-mapping filter                                       | 9,831,618        | 38,943        | 656              | 1.77        |
| <b>Filter combinations</b>                                 |                  |               |                  |             |
| b + c                                                      | 10,388,723       | 41,407        | 898              | 3.03        |
| b + d                                                      | 9,417,600        | 37,388        | 628              | 1.39        |
| c + d                                                      | 8,980,539        | 35,472        | 536              | 1.19        |
| b + c + d                                                  | 8,816,836        | 34,861        | 512              | 1.16        |
| <b>a + b + d</b>                                           | <b>8,819,704</b> | <b>35,672</b> | <b>588</b>       | <b>0.61</b> |
| a + b + c + d                                              | 8,268,341        | 33,365        | 481              | 0.52        |

Note: Filtering scheme a + b + d, highlighted in bold, was used in subsequent analyses. The bed-file with coordinates of the used ChrY segments are listed in the Supplementary Table S2a\_b\_d for the a+b+d filters and Supplementary Table S2c for the regional exclusion mask.

**Table S3. Summary statistics of mtDNA and Y chromosome genetic diversity by continental regions.**

| Continental region             | n  | mtDNA (L=16.6 Kb) |     |             |                        | NRY (L=8.8 Mb) |      |               |                        |
|--------------------------------|----|-------------------|-----|-------------|------------------------|----------------|------|---------------|------------------------|
|                                |    | S                 | PS  | mpd ± SE    | $\pi \pm SE (10^{-3})$ | S              | PS   | mpd ± SE      | $\pi \pm SE (10^{-5})$ |
| <b>Africa</b>                  | 26 | 371               | 191 | 67.6 ± 30.0 | 4.1 ± 2.0              | 6,323          | 5667 | 987.8 ± 434.1 | 11.20 ± 4.92           |
| <b>Andes</b>                   | 13 | 116               | 33  | 32.1 ± 15.0 | 1.9 ± 1.0              | 1,104          | 751  | 256.1 ± 117.3 | 2.90 ± 1.33            |
| <b>Central Asia</b>            | 20 | 245               | 57  | 36.9 ± 16.8 | 2.2 ± 1.1              | 2,490          | 744  | 403.5 ± 180   | 4.57 ± 2.04            |
| <b>Europe</b>                  | 81 | 412               | 141 | 25.6 ± 11.3 | 1.5 ± 0.8              | 5,837          | 2698 | 586.1 ± 252.8 | 6.65 ± 2.87            |
| <b>Near East</b>               | 45 | 347               | 105 | 31.7 ± 14.1 | 1.9 ± 1.0              | 5,841          | 2867 | 644.1 ± 280.1 | 7.30 ± 3.18            |
| <b>Papua New Guinea</b>        | 6  | 88                | 27  | 37.1 ± 18.9 | 2.2 ± 1.3              | 1,060          | 480  | 612.0 ± 306.3 | 6.94 ± 3.47            |
| <b>Southeast and East Asia</b> | 42 | 353               | 149 | 34.6 ± 15.4 | 2.1 ± 1.0              | 8,040          | 5773 | 749.2 ± 326.3 | 8.49 ± 3.70            |
| <b>Siberia</b>                 | 62 | 388               | 143 | 33.3 ± 14.7 | 2.0 ± 1.0              | 3,542          | 1578 | 674.3 ± 291.8 | 7.65 ± 3.31            |
| <b>South Asia</b>              | 25 | 257               | 86  | 32.2 ± 14.5 | 1.9 ± 1.0              | 4,575          | 2593 | 649.1 ± 286.8 | 7.36 ± 3.25            |

Note: mtDNA – mitochondrial DNA, NRY – non-recombining region of the Y chromosome, L – sequence length, S – number of segregating sites, PS – number of private sites, mpd – number of mean pairwise differences, SE – standard error,  $\pi$  - mpd normalized for sequence length.

**Table S4. Regional male-specific effective population sizes estimated from Y chromosome data at the Holocene dip and present time.**

|                | Nm (now) | Nm (dip) | T (dip) |
|----------------|----------|----------|---------|
| Africa         | 5,000    | 1,000    | 5.4     |
| Near East      | 44,000   | 3,000    | 8.3     |
| Europe         | 40,000   | 1,000    | 5.0     |
| South Asia     | 16,000   | 3,000    | 4.3     |
| Central Asia   | 2,000    | 1,000    | 4.7     |
| Southeast Asia | 24,000   | 4,000    | 5.9     |
| Siberia        | 13,000   | 1,000    | 1.4     |

Note: the T estimates are presented in thousands of years assuming generation time of 32 years (Fenner 2005).

**Table S5. Assignment of Y chromosome haplogroups by time thresholds.**

Estimates of age in thousands of years are based on the chrY mutation rate of  $0.74 \times 10^{-9}$  /bp/yr used elsewhere in this paper. Assignment of haplogroup depth level reflects the distance from tips to the haplogroup root.

| <b>Level</b> | <b>Age</b> | <b>Haplogroup names</b>    |
|--------------|------------|----------------------------|
| I            | ~>40 ky    | A, B, C, D, E, F, G, H     |
| II           | >20 ky     | B2, B4, B5, E1, E2, R1, R2 |
| III          | >10 ky     | E1a, E1b, E1c, R1a, R1b    |
| IV           | >5 ky      | E1a1, E1a2, R1a1, R1b2     |

**Table S6. Haplogroup and population affiliation of the Y chromosome samples used in this study.**

| No | Assembly ID                 | Short ID | Population/Country | Haplogroup |
|----|-----------------------------|----------|--------------------|------------|
| 1  | GRC13292545                 | #N/A     | Mbo                | A00        |
| 2  | GRC13292546                 | #N/A     | Mbo                | A00        |
| 3  | GS000016204-ASM             | ISR07    | Ethiopian-Jews     | A3         |
| 4  | GS000035247-ASM             | CongPy6  | Congo-Pygmies      | A2         |
| 5  | GS000035246-ASM             | CongPy3  | Congo-Pygmies      | B2         |
| 6  | GS000001577-ASM             | Sandw4   | Sandawe            | B5         |
| 7  | GS000003125-ASM             | Hadza4   | Hadza              | B5         |
| 8  | GS00319-DNA_A01_1100_37-ASM | BakaPy1  | Baka-Pygmies       | B4         |
| 9  | GS00319-DNA_C01_1100_37-ASM | BakaPy3  | Baka-Pygmies       | B4         |
| 10 | GS000001807-ASM             | Hadza5   | Hadza              | B4         |
| 11 | GS000003124-ASM             | Hadza2   | Hadza              | B4         |
| 12 | GS00319-DNA_G01_1100_37-ASM | Hadza3   | Hadza              | B4         |
| 13 | GS00319-DNA_G02_1100_37-ASM | Sandw5   | Sandawe            | B4         |
| 14 | NA18940-200-37-ASM          | JPT_1    | Japanese           | D2         |
| 15 | GS000010424-ASM             | Chn2     | Chinese            | D1         |
| 16 | GS000035037-ASM             | NplTA1   | Tamang             | D1         |
| 17 | NA19239-L2-200-37-ASM       | YRI_12   | Yoruba             | E4         |
| 18 | GS00253-DNA_B02_200_37-ASM  | hu604D39 | NA                 | E1b        |
| 19 | GS000035245-ASM             | CongPy1  | Congo-Pygmies      | E1a1       |
| 20 | NA18504-200-37-ASM          | YRI_3    | Yoruba             | E1a1       |
| 21 | NA19834-200-37-ASM          | ASW_5    | African-Americans  | E1a1       |
| 22 | NA19026-200-37-ASM          | LWK_4    | Luhya              | E1a1       |
| 23 | GS00319-DNA_B01_1100_37-ASM | BakaPy2  | Baka-Pygmies       | E1a1       |
| 24 | GS00319-DNA_D01_1100_37-ASM | BakoPy1  | Bakola-Pygmies     | E1a1       |
| 25 | GS00319-DNA_F01_1100_37-ASM | Hadza1   | Hadza              | E1a1       |
| 26 | NA18501-200-37-ASM          | YRI_1    | Yoruba             | E1a2       |
| 27 | NA19700-200-37-ASM          | ASW_1    | African-Americans  | E1a2       |
| 28 | NA19703-200-37-ASM          | ASW_3    | African-Americans  | E1a2       |
| 29 | GS00319-DNA_E01_1100_37-ASM | BedzPy1  | Bedzan-Pygmies     | E1a2       |

|    |                                                |          |                 |       |
|----|------------------------------------------------|----------|-----------------|-------|
| 30 | NA19025-200-37-ASM<br>GS00319-DNA_C02_1100_37- | LWK_3    | Luhya           | E1a2  |
| 31 | ASM                                            | Sandw1   | Sandawe         | E1a2  |
| 32 | NA19020-200-37-ASM<br>GS00319-DNA_D02_1100_37- | LWK_2    | Luhya           | E1a2  |
| 33 | ASM<br>GS00319-DNA_E02_1100_37-                | Sandw2   | Sandawe         | E2b3  |
| 34 | ASM                                            | Sandw3   | Sandawe         | E2b3  |
| 35 | GS000016217-ASM                                | CArab1   | Arab-Christian  | E2b2  |
| 36 | GS000016206-ASM                                | CArab3   | Arab-Christian  | E2b1  |
| 37 | GS000015230-ASM<br>GS00253-DNA_H01_200_37-     | huF1DC30 | NA              | E2b1  |
| 38 | ASM                                            | huAE6220 | NA              | E2b1  |
| 39 | GS000016214-ASM                                | ISR21    | Uzbekistan-Jews | E2b1  |
| 40 | GS000014561-ASM<br>GS00253-DNA_F01_200_37-     | hu016B28 | NA              | E2b1  |
| 41 | ASM                                            | hu04FD18 | NA              | E2b1  |
| 42 | GS000011811-ASM                                | hu4BF398 | US              | E2a3  |
| 43 | GS000016179-ASM                                | Iran4    | Iranians        | E2a3  |
| 44 | GS000015708-ASM                                | hu8F918A | NA              | E2a2  |
| 45 | NA21732-200-37-ASM                             | MKK_1    | Maasai          | E2a2  |
| 46 | NA21737-200-37-ASM                             | MKK_3    | Maasai          | E2a2  |
| 47 | GS000017206-ASM                                | Est4     | Estonians       | E2a1  |
| 48 | GS000015892-ASM                                | huFA70A3 | US              | E2a1  |
| 49 | GS000035021-ASM                                | Alban1   | Albanians       | E2a1  |
| 50 | GS000016441-ASM                                | UK2      | British         | E2a1  |
| 51 | GS000014562-ASM                                | hu627574 | NA              | E2a1  |
| 52 | NA20510-200-37-ASM                             | TSI_3    | Italians        | E2a1  |
| 53 | GS000015153-ASM                                | huD52556 | US              | E2a1  |
| 54 | GS000035227-ASM                                | Aus2     | Australian      | E2a1  |
| 55 | GS000013763-ASM                                | TatarM1  | Mishar-Tatars   | E2a1  |
| 56 | GS000015172-ASM                                | hu011C57 | NA              | E2a1  |
| 57 | GS000017005-ASM                                | Bajo19   | Bajo            | C2    |
| 58 | GS000017004-ASM                                | Bajo2    | Bajo            | C2a1a |
| 59 | GS000035255-ASM                                | Koinb2   | Koinanbe        | C2a2a |
| 60 | GS000035258-ASM                                | Koinb3   | Koinanbe        | C2a2a |
| 61 | GS000035686-ASM                                | Koinb1   | Koinanbe        | C2a2a |
| 62 | GS000020271-ASM                                | Dusun8   | Dusun           | C9    |
| 63 | GS000017146-ASM                                | MPLc1    | Madhya-Pradesh  | C5a   |
| 64 | GS000016936-ASM                                | Lebb3    | Lebbo           | C7a   |
| 65 | GS000016937-ASM                                | Lebb4    | Lebbo           | C7a   |
| 66 | GS000019981-ASM                                | Murut3   | Murut           | C7b1  |
| 67 | GS000035257-ASM                                | Aeta3    | Aeta            | C7b1  |
| 68 | GS000020272-ASM                                | Murut5   | Murut           | C7b1  |

|     |                 |                  |                 |       |
|-----|-----------------|------------------|-----------------|-------|
| 69  | GS000022099-ASM | Murut5_duplicate | Murut           | C7b1  |
| 70  | GS000015179-ASM | Chn1             | Chinese         | C3f1  |
| 71  | GS000022091-ASM | Bur355           | Buryats         | C3f1  |
| 72  | GS000014418-ASM | Bur2             | Buryats         | C3f1  |
| 73  | GS000022094-ASM | Bur578           | Buryats         | C3f1  |
| 74  | GS000020113-ASM | Bur383           | Buryats         | C3f1  |
| 75  | GS000013761-ASM | Bur11            | Buryats         | C3f1  |
| 76  | GS000022090-ASM | Bur350           | Buryats         | C3f1  |
| 77  | GS000022092-ASM | Bur361           | Buryats         | C3f1  |
| 78  | GS000022066-ASM | Bur318           | Buryats         | C3f1  |
| 79  | GS000022093-ASM | Bur398           | Buryats         | C3f1  |
| 80  | GS000019992-ASM | Krk116           | Koryaks         | C3i   |
| 81  | GS000022071-ASM | KrkG3            | Koryaks         | C3g   |
| 82  | GS000022440-ASM | Altai6           | Altai-Kizhi     | C3g   |
| 83  | GS000013752-ASM | Kaz2             | Kazakhs         | C3h   |
| 84  | GS000014335-ASM | Evnk2            | Evenks          | C3c2  |
| 85  | GS000019993-ASM | Krk119           | Koryaks         | C3c2  |
| 86  | GS000016168-ASM | koryak33         | Koryaks         | C3c2  |
| 87  | GS000016169-ASM | koryak42         | Koryaks         | C3c2  |
| 88  | GS000035117-ASM | Mong3            | Mongol-Zakhchin | C3c1a |
| 89  | GS000020004-ASM | Evk14            | Evenks          | C3c1a |
| 90  | GS000020126-ASM | Bur530           | Buryats         | C3c1a |
| 91  | GS000022293-ASM | EvenM2           | Evens           | C3c1a |
| 92  | GS000034297-ASM | EvN21            | Evens           | C3c1a |
| 93  | GS000016165-ASM | EvenS1           | Evens           | C3c1a |
| 94  | GS000020129-ASM | EvenM1           | Evens           | C3c1a |
| 95  | GS000022292-ASM | EvenM3           | Evens           | C3c1a |
| 96  | GS000016806-ASM | Mal1             | Malayan         | H3    |
| 97  | GS000019903-ASM | Burm10           | Burmese         | H2    |
| 98  | GS000035123-ASM | Balija1          | Balija          | H1b   |
| 99  | GS000016965-ASM | PuMc1            | Punjabi         | H1b   |
| 100 | GS000035035-ASM | Bangl2           | Bangladeshi     | H1b   |
| 101 | GS000020270-ASM | Burm14           | Burmese         | H1a   |
| 102 | GS000016805-ASM | Asur1            | Asur            | H1a   |
| 103 | GS000035039-ASM | Khsat1           | Kshatriya       | H1a   |
| 104 | GS000016821-ASM | Kol1             | Kol             | H1a   |
| 105 | GS000035034-ASM | Bangl1           | Bangladeshi     | H1a   |
| 106 | GS000014366-ASM | Lezg3            | Lezgins         | G2a1  |
| 107 | GS000016899-ASM | Mold3            | Moldavians      | G2a1  |
| 108 | GS000014409-ASM | Abkhaz5          | Abkhazians      | G2a1  |
| 109 | GS000013739-ASM | NOsset6          | North-Ossetians | G2a1  |
| 110 | GS000014414-ASM | NOsset2          | North-Ossetians | G2a1  |
| 111 | GS000014475-ASM | Iran2            | Iranians        | G2a4  |

|     |                            |          |                 |      |
|-----|----------------------------|----------|-----------------|------|
| 112 | GS000016215-ASM            | ISR22    | Uzbekistan-Jews | G2a4 |
| 113 | GS000016209-ASM            | ISR12    | Iraqi-Jews      | G2a4 |
| 114 | GS000011806-ASM            | hu63EB0A | US              | G2a2 |
| 115 | NA19670-200-37-ASM         | MXL_5    | Mexicans        | G2a2 |
| 116 | GS000014413-ASM            | Kabard4  | Kabardins       | G2a2 |
| 117 | GS000016372-ASM            | Pole5    | Poles           | G2a2 |
| 118 | GS000015176-ASM            | hu6C733E | US              | I1g  |
| 119 | GS000016442-ASM            | hu032C04 | US              | I1g  |
| 120 | GS00253-DNA_E01_200_37-ASM | hu9385BA | NA              | I1e  |
| 121 | GS000015888-ASM            | hu88A079 | NA              | I1f  |
| 122 | GS000016104-ASM            | BelaR2   | Belarusians     | I1b  |
| 123 | NA12891-200-37-ASM         | CEPH_15  | NW-Europeans    | I1c  |
| 124 | GS000013698-ASM            | Mord3    | Mordvins        | I1c  |
| 125 | GS000014328-ASM            | Komi1    | Komis           | I1c  |
| 126 | GS000011808-ASM            | huAEADC0 | NA              | I1a  |
| 127 | GS000010435-ASM            | huB4940E | NA              | I1a  |
| 128 | NA06994-200-37-ASM         | CEU_2    | NW-Europeans    | I1a  |
| 129 | GS000015272-ASM            | hu553620 | NA              | I1a  |
| 130 | GS000035226-ASM            | Aus1     | Australian      | I1a  |
| 131 | GS000010320-ASM            | huB1FD55 | NA              | I1a  |
| 132 | GS000016901-ASM            | Hun2     | Hungarians      | I1a  |
| 133 | NA20511-200-37-ASM         | TSI_4    | Italians        | I1a  |
| 134 | GS000035150-ASM            | Georg1   | Georgians       | I3   |
| 135 | GS000014557-ASM            | hu448C4B | US              | I2e  |
| 136 | GS000011817-ASM            | hu775356 | NA              | I2d  |
| 137 | GS000016450-ASM            | hu82E689 | US              | I2d  |
| 138 | GS000015709-ASM            | hu939B7C | US              | I2d  |
| 139 | GS000016446-ASM            | huDBF9DD | NA              | I2d  |
| 140 | GS000013164-ASM            | hu0CF2EE | NA              | I2d  |
| 141 | GS000016337-ASM            | huC434ED | NA              | I2d  |
| 142 | GS000010438-ASM            | hu040C0A | NA              | I2b  |
| 143 | GS000014560-ASM            | huD10E53 | NA              | I2a  |
| 144 | GS000014570-ASM            | huB4D223 | US              | I2a  |
| 145 | GS000013764-ASM            | Chuv1    | Chuvashes       | I2a  |
| 146 | GS000015225-ASM            | Ukr9     | Ukrainians      | I2a  |
| 147 | GS000013754-ASM            | croat12  | Croats          | I2a  |
| 148 | GS000015873-ASM            | croat13  | Croats          | I2a  |
| 149 | GS000017632-ASM            | Veps3    | Vepsas          | I2a  |
| 150 | GS000016904-ASM            | Lit2     | Lithuanians     | I2a  |
| 151 | GS000014324-ASM            | BelaR1   | Belarusians     | I2a  |
| 152 | GS000014351-ASM            | BelaR3   | Belarusians     | I2a  |
| 153 | GS000013741-ASM            | Azerb13  | Azerbaijanis    | J1c  |

|     |                 |          |                     |       |
|-----|-----------------|----------|---------------------|-------|
| 154 | GS000014421-ASM | Tabas4   | Tabasarans          | J1a1  |
| 155 | GS000014368-ASM | Kumk2    | Kumyks              | J1a1  |
| 156 | GS000014405-ASM | Avar1    | Avars               | J1a1  |
| 157 | GS000013724-ASM | Lezg2    | Lezgins             | J1a2  |
| 158 | GS000009929-ASM | hu2DBF2D | US                  | J1a2  |
| 159 | GS000011735-ASM | hu6E4515 | NA                  | J1b7  |
| 160 | GS000035126-ASM | Armen4   | Armenians           | J1b6  |
| 161 | GS000035125-ASM | Armen5   | Armenians           | J1b5  |
| 162 | GS000014474-ASM | Jord2    | Jordanians          | J1b4  |
| 163 | GS000035124-ASM | Armen2   | Armenians           | J1b3  |
| 164 | GS000035434-ASM | Alban3   | Albanians           | J1b3  |
| 165 | GS000016136-ASM | ISR35    | Druze               | J1b2  |
| 166 | GS000016887-ASM | Israel49 | Yemen-Jews          | J1b1  |
| 167 | GS000016973-ASM | ISR41    | Yemenite-Jews       | J1b1  |
| 168 | GS000013745-ASM | Armen3   | Armenians           | J1b1  |
| 169 | GS000016213-ASM | MArab2   | Arab-Muslim         | J1b1  |
| 170 | GS000016180-ASM | Saudi1   | Arabs               | J1b1  |
| 171 | GS000016277-ASM | Saudi2   | Arabs               | J1b1  |
| 172 | GS000014410-ASM | Abkhaz6  | Abkhazians          | J2a11 |
| 173 | GS000013751-ASM | Assyr4   | Assyrians           | J2a6  |
| 174 | GS000035685-ASM | Georg2   | Georgians-Imeretins | J2a4  |
| 175 | GS000010431-ASM | hu05FD49 | NA                  | J2a3  |
| 176 | GS000015875-ASM | Kryash4  | Babtized-Tatars     | J2a2  |
| 177 | GS000016802-ASM | Kapu1    | Kapu                | J2a7  |
| 178 | GS000016445-ASM | huD9EE1E | NA                  | J2a7  |
| 179 | GS000013747-ASM | Iran1    | Iranians            | J2a8  |
| 180 | GS000016177-ASM | Kyrgyz1  | Kyrgyz              | J2a8  |
| 181 | GS000015895-ASM | hu0A4518 | US                  | J2a10 |
| 182 | GS000035115-ASM | Kabard3  | Kabardins           | J2a9  |
| 183 | GS000016181-ASM | Jord1    | Jordanians          | J2b1  |
| 184 | GS000013746-ASM | Armen7   | Armenians           | J2b1  |
| 185 | GS000016882-ASM | Israel44 | Mumbai-Jews         | J2b1  |
| 186 | GS000010434-ASM | hu4040B8 | NA                  | J2b4  |
| 187 | GS000016373-ASM | hu33E2D9 | NA                  | J2b2  |
| 188 | GS000035147-ASM | Alban2   | Albanians           | J2b2  |
| 189 | GS000015174-ASM | hu7123C1 | NA                  | J2b2  |
| 190 | GS000016138-ASM | ISR37    | Cochin-Jews         | J2b2  |
| 191 | GS000013705-ASM | Tatar2   | Tatars              | L1b   |
| 192 | GS000016135-ASM | ISR34    | Druze               | L1b   |
| 193 | GS000016210-ASM | ISR13    | Georgian-Jews       | T1a1  |
| 194 | GS000016212-ASM | MArab1   | Arab-Muslim         | T1a1  |
| 195 | GS000035392-ASM | Agta1    | Agta                | P2    |
| 196 | GS000035249-ASM | Aeta1    | Aeta                | S3a1  |

|     |                    |         |               |       |
|-----|--------------------|---------|---------------|-------|
| 197 | GS000035250-ASM    | Aeta2   | Aeta          | S3a1  |
| 198 | GS000016935-ASM    | Lebb2   | Lebbo         | S2    |
| 199 | GS000016941-ASM    | Bajo17  | Bajo          | S1    |
| 200 | GS000035260-ASM    | Kosip2  | Kosipe        | M1c   |
| 201 | GS000035256-ASM    | Kosip1  | Kosipe        | M1c   |
| 202 | GS000035365-ASM    | Kosip3  | Kosipe        | M1c   |
| 203 | GS000019966-ASM    | Igrt1   | Igorot        | O3e   |
| 204 | GS000017006-ASM    | Bajo21  | Bajo          | O3i   |
| 205 | GS000035253-ASM    | Batak3  | Batak         | O3i   |
| 206 | GS000022100-ASM    | Burm15  | Burmese       | O3b   |
| 207 | GS000019904-ASM    | Burm12  | Burmese       | O3a1  |
| 208 | GS000019902-ASM    | Burm8   | Burmese       | O3a1  |
| 209 | GS000019906-ASM    | Burm20  | Burmese       | O3a1  |
| 210 | GS000019901-ASM    | Burm3   | Burmese       | O3a1  |
| 211 | GS000019905-ASM    | Burm4   | Burmese       | O3a1  |
| 212 | GS000035248-ASM    | Agta3   | Agta          | O1a   |
| 213 | GS000035435-ASM    | Agta2   | Agta          | O1b   |
| 214 | GS000035252-ASM    | Batak2  | Batak         | O1c   |
| 215 | GS000019983-ASM    | Murut6  | Murut         | O1c   |
| 216 | GS000019985-ASM    | Murut13 | Murut         | O1c   |
| 217 | GS000035251-ASM    | Batak1  | Batak         | O1c   |
| 218 | GS000019946-ASM    | VietN4  | Vietnamese    | O2a1  |
| 219 | GS000019949-ASM    | VietS3  | Vietnamese    | O2a1  |
| 220 | GS000019953-ASM    | Dusun7  | Dusun         | O2a2  |
| 221 | GS000019979-ASM    | Dusun12 | Dusun         | O2a2  |
| 222 | GS000016803-ASM    | Gond1   | Gond          | O2a2  |
| 223 | GS000017007-ASM    | Lebb1   | Lebbo         | O2a2  |
| 224 | GS000016804-ASM    | Ho1     | Ho            | O2a2  |
| 225 | GS000019950-ASM    | VietS2  | Vietnamese    | O2a2  |
| 226 | GS000019972-ASM    | VietS1  | Vietnamese    | O2a2  |
| 227 | NA18558-200-37-ASM | CHB_4   | Han           | N4    |
| 228 | GS000014332-ASM    | Mari3   | Maris         | N2a1  |
| 229 | GS000035244-ASM    | Veps4   | Vepsas        | N2a1  |
| 230 | GS000035432-ASM    | Udmrd3  | Udmurds       | N2a1  |
| 231 | GS000016167-ASM    | EvenS3  | Evens         | N2a1  |
| 232 | GS000016163-ASM    | NentT1  | Tundra-Nenets | N2a1a |
| 233 | GS000015879-ASM    | NenetF3 | Forest-Nenets | N2a1a |
| 234 | GS000016162-ASM    | NentT2  | Tundra-Nenets | N2a1a |
| 235 | GS000016968-ASM    | Tuva1   | Tuvinians     | N2a1a |
| 236 | GS000017247-ASM    | Tuva2   | Tuvinians     | N2a1a |
| 237 | GS000035235-ASM    | Mong5   | Mongol-Khalkh | N2a1a |
| 238 | GS000020108-ASM    | Evk55   | Evenks        | N2a1a |
| 239 | GS000022441-ASM    | Yakk4   | Yakuts        | N2a1a |

|     |                 |          |                  |       |
|-----|-----------------|----------|------------------|-------|
| 240 | GS000022438-ASM | Shor1    | Shor             | N3b   |
| 241 | GS000015715-ASM | Mari2    | Maris            | N3a1  |
| 242 | GS000013694-ASM | Udmrd2   | Udmurds          | N3a1  |
| 243 | GS000014331-ASM | Mari1    | Maris            | N3a1  |
| 244 | GS000035017-ASM | Udmrd4   | Udmurds          | N3a1  |
| 245 | GS000017169-ASM | Lebn1    | Lebanese         | N3a2  |
| 246 | GS000016166-ASM | EvenS2   | Evens            | N3a2  |
| 247 | GS000020490-ASM | YakK3    | Yakuts           | N3a2  |
| 248 | GS000014333-ASM | YakS8    | Yakutian         | N3a2  |
| 249 | GS000022076-ASM | YakM1    | Yakuts           | N3a2  |
| 250 | GS000035116-ASM | Mong2    | Mongol-Khalkh    | N3a5  |
| 251 | GS000016190-ASM | Mong1    | Mongol-Khalkh    | N3a5  |
| 252 | GS000035236-ASM | Mong6    | Mongol-Khalkh    | N3a5  |
| 253 | GS000035127-ASM | Kaz3     | Kazakhs          | N3a5  |
| 254 | GS000020491-ASM | Bur406   | Buryats          | N3a5  |
| 255 | GS000022077-ASM | Bur336   | Buryats          | N3a5  |
| 256 | GS000020002-ASM | Chuk9    | Chukchis         | N3a5  |
| 257 | GS000033948-ASM | KrkG294  | Koryaks          | N3a5  |
| 258 | GS000022068-ASM | KrkG152  | Koryaks          | N3a5  |
| 259 | GS000019998-ASM | Esk3     | Eskimo           | N3a5  |
| 260 | GS000020001-ASM | Chuk5    | Chukchis         | N3a5  |
| 261 | GS000022069-ASM | KrkG233  | Koryaks          | N3a5  |
| 262 | GS000016186-ASM | CoskK1   | Kuban-Cossacks   | N3a4  |
| 263 | GS000016971-ASM | Veps2    | Vepsas           | N3a4  |
| 264 | GS000035149-ASM | Karel3   | Karelians        | N3a4  |
| 265 | GS000017207-ASM | Est18    | Estonians        | N3a4  |
| 266 | GS000017213-ASM | Est19    | Estonians        | N3a4  |
| 267 | GS000017380-ASM | Est17    | Estonians        | N3a4  |
| 268 | GS000018757-ASM | Est20    | Estonians        | N3a4  |
| 269 | GS000014416-ASM | RusPi1   | North-Russians   | N3a3  |
| 270 | GS000035024-ASM | Saami4   | Saami            | N3a3b |
| 271 | GS000035025-ASM | Saami5   | Saami            | N3a3b |
| 272 | GS000017208-ASM | Est6     | Estonians        | N3a3b |
| 273 | GS000017203-ASM | Est23    | Estonians        | N3a3b |
| 274 | GS000017214-ASM | Est21    | Estonians        | N3a3b |
| 275 | GS000017219-ASM | Est24    | Estonians        | N3a3b |
| 276 | GS000015180-ASM | huFFAD87 | Estonians        | N3a3a |
| 277 | GS000020110-ASM | Evn31    | Evens            | N3a3a |
| 278 | GS000015228-ASM | huC5733C | Estonians        | N3a3a |
| 279 | GS000016819-ASM | RusPs1   | Central-Russians | N3a3a |
| 280 | GS000035148-ASM | Lat3     | Latvians         | N3a3a |
| 281 | GS000035027-ASM | Lat2     | Latvians         | N3a3a |
| 282 | GS000016907-ASM | Est11    | Estonians        | N3a3a |

|     |                         |          |                    |       |
|-----|-------------------------|----------|--------------------|-------|
| 283 | GS000017210-ASM         | Est2     | Estonians          | N3a3a |
| 284 | GS000015887-ASM         | huEDEA65 | NA                 | Q3    |
| 285 | GS000035120-ASM         | TrkUzb3  | Turkmens           | Q2a   |
| 286 | GS000035118-ASM         | TrkUzb1  | Turkmens           | Q2a   |
| 287 | GS000035119-ASM         | TrkUzb2  | Turkmens           | Q2a   |
| 288 | GS000019986-ASM         | Murut19  | Murut              | Q2c   |
| 289 | GS000034970-ASM         | KrkG14   | Koryaks            | Q2b   |
| 290 | GS000034185-ASM         | KrkG13   | Koryaks            | Q2b   |
| 291 | GS000022067-ASM         | KrkG11   | Koryaks            | Q2b   |
| 292 | GS000022072-ASM         | KrkG55   | Koryaks            | Q2b   |
| 293 | GS000015872-ASM         | croat11  | Croats             | Q1d   |
| 294 | GS000035038-ASM         | NepBr1   | Nepali             | Q1d   |
| 295 | GS000035030-ASM         | Uzbk3    | Uzbek              | Q1c   |
| 296 | GS000015393-ASM         | Ket2     | Kets               | Q1c   |
| 297 | GS000013716-ASM         | Selkp3   | Selkups            | Q1c   |
| 298 | GS000013717-ASM         | Ket1     | Kets               | Q1c   |
| 299 | GS000019997-ASM         | Esk2     | Eskimo             | Q1a   |
| 300 | GS000016940-ASM         | Cachi3   | Andean-Calchaquíes | Q1a   |
| 301 | GS000019989-ASM         | AndS11   | Colla, Andean-HA   | Q1a   |
| 302 | GS000016945-ASM         | Wichi3   | Wichi, Andean-LA   | Q1a   |
| 303 | GS000016946-ASM         | Wichi4   | Wichi, Andean-LA   | Q1a   |
| 304 | GS000017077-ASM         | Cachi4   | Andean-Calchaquíes | Q1a   |
| 305 | GS000019960-ASM         | AndS41   | Colla, Andean-HA   | Q1a   |
| 306 | GS000019961-ASM         | AndT12   | Colla, Andean-HA   | Q1a   |
| 307 | NA19735-200-37-ASM      | MXL_1    | Mexicans           | Q1a   |
| 308 | GS000016951-ASM         | Colla4   | Colla, Andean-HA   | Q1a   |
| 309 | GS000016942-ASM         | Cachi5   | Andean-Calchaquíes | Q1a   |
| 310 | GS000020273-ASM         | AndS23   | Colla, Andean-HA   | Q1a   |
| 311 | GS000020274-ASM         | AndS47   | Colla, Andean-HA   | Q1a   |
| 312 | GS000016216-ASM         | ISR23    | Iranian-Jews       | R2a   |
| 313 | GS000016798-ASM         | Thak1    | Thakur             | R2a   |
| 314 | GS000016807-ASM         | Brahm2   | Brahmin            | R2a   |
| 315 | GS000016809-ASM         | Brahm1   | Brahmin            | R2a   |
| 316 | GS000016800-ASM         | Santh1   | Santhal            | R2a   |
| 317 | NA20845-200-37-ASM      | GIH_1    | Gujaratis          | R2a   |
| 318 | GS000014566-ASM         | hu7A2F1D | NA                 | R1a3  |
| 319 | GS000015183-ASM         | hu4FE0D1 | US                 | R1a3  |
| 320 | GS000035026-ASM         | Saami6   | Saami              | R1a1e |
| 321 | GS000035109-ASM         | Swe1     | Swedes             | R1a1e |
| 322 | GS000035240-ASM         | Swe2     | Swedes             | R1a1e |
| 323 | GS000011805-ASM         | hu259AC7 | US                 | R1a1d |
| 324 | GS000013704-ASM         | Tatar3   | Tatars             | R1a1d |
| 325 | GS00253-DNA_B01_200_37- | huC30901 | NA                 | R1a1d |

## ASM

|     |                            |                    |                  |       |
|-----|----------------------------|--------------------|------------------|-------|
| 326 | GS000035113-ASM            | Cirkas2            | Circassians      | R1a1d |
| 327 | GS000010494-ASM            | hu955EE1           | US               | R1a1d |
| 328 | GS000035238-ASM            | Cosk1              | Cossacks         | R1a1d |
| 329 | GS000035178-ASM            | UkrnW3             | Ukrainians       | R1a1c |
| 330 | GS000035041-ASM            | Hun_3              | Hungarians       | R1a1c |
| 331 | GS000035179-ASM            | CoskK2             | Kuban-Cossacks   | R1a1c |
| 332 | GS000013755-ASM            | UkrN1              | Ukrainians       | R1a1c |
| 333 | GS000020417-ASM            | hu8073B9           | US               | R1a1c |
| 334 | GS000016338-ASM            | hu57A769           | NA               | R1a1c |
| 335 | GS000035176-ASM            | UkrnE3             | Ukrainians       | R1a1c |
| 336 | GS000014330-ASM            | Mord2              | Mordvins         | R1a1c |
| 337 | GS000035174-ASM            | UkrnE2             | Ukrainians       | R1a1c |
| 338 | GS000016797-ASM            | RusRz1             | Central-Russians | R1a1b |
| 339 | GS000035121-ASM            | UkrnE1             | Ukrainians       | R1a1b |
| 340 | GS000016916-ASM            | Est27              | Estonians        | R1a1b |
| 341 | GS000017215-ASM            | Est26              | Estonians        | R1a1b |
| 342 | GS000010327-ASM            | hu34D5B9_duplicate | Ukrainians       | R1a1a |
| 343 | GS000015891-ASM            | Ukr7               | Ukrainians       | R1a1a |
| 344 | GS000035177-ASM            | UkrnW2             | Ukrainians       | R1a1a |
| 345 | GS000013765-ASM            | Karel1             | Karelians        | R1a1a |
| 346 | GS000016970-ASM            | Karel2             | Karelians        | R1a1a |
| 347 | GS000016796-ASM            | RusPs2             | Central-Russians | R1a1a |
| 348 | GS000013756-ASM            | RusPi2             | North-Russians   | R1a1a |
| 349 | GS000014329-ASM            | Komi2_dupl         | Komis            | R1a1a |
| 350 | GS000035018-ASM            | Komi2              | Komi-Zyrian      | R1a1a |
| 351 | GS000016174-ASM            | Altai3             | Altai-Kizhi      | R1a2a |
| 352 | GS000016967-ASM            | Altai4             | Altai-Telengit   | R1a2a |
| 353 | GS000016187-ASM            | KyrgyzTJ2          | Kyrgyz           | R1a2a |
| 354 | GS000016193-ASM            | KyrgyzTJ1          | Kyrgyz           | R1a2a |
| 355 | GS000016195-ASM            | KyrgyzTJ3          | Kyrgyz           | R1a2a |
| 356 | GS000016875-ASM            | Iran3              | Iranians         | R1a2  |
| 357 | GS000013749-ASM            | Assyr1             | Assyrians        | R1a2  |
| 358 | GS000015893-ASM            | hu60AB7C           | NA               | R1a2  |
| 359 | GS000016207-ASM            | ISR10              | Ashkenazi-Jews   | R1a2  |
| 360 | GS00253-DNA_D01_200_37-ASM | huE80E3D           | NA               | R1a2  |
| 361 | GS000016196-ASM            | Ishk2              | Ishkasim         | R1a2  |
| 362 | GS000035239-ASM            | Cosk2              | Cossacks         | R1a2b |
| 363 | GS000016189-ASM            | Ishk1              | Ishkasim         | R1a2b |
| 364 | GS000016808-ASM            | OrMc1              | Odisha           | R1a2b |
| 365 | GS000016966-ASM            | Kurmi1             | Kurmi            | R1a2b |
| 366 | GS000016799-ASM            | Gupta1             | Gupta            | R1a2b |

|     |                    |          |                |       |
|-----|--------------------|----------|----------------|-------|
| 367 | NA20850-200-37-ASM | GIH_4    | Gujaratis      | R1a2b |
| 368 | NA20846-200-37-ASM | GIH_2    | Gujaratis      | R1a2b |
| 369 | GS000014415-ASM    | Kaz1     | Kazakhs        | R1a2b |
| 370 | GS000016801-ASM    | Beng2    | West-Bengali   | R1a2b |
| 371 | GS000016972-ASM    | ISR40    | Iraqi-Jews     | R1a2b |
| 372 | GS000014417-ASM    | RVnch2   | Rushan-Vanch   | R1a2  |
| 373 | GS000016198-ASM    | ISR01    | Iraqi-Jews     | R1a2d |
| 374 | GS000016276-ASM    | Bashk4   | Bashkirs       | R1a2d |
| 375 | GS000022439-ASM    | Altai5   | Altai-Kizhi    | R1a2c |
| 376 | GS000013757-ASM    | Kyrgyz4  | Kyrgyz         | R1a2c |
| 377 | GS000016191-ASM    | Kyrgyz2  | Kyrgyz         | R1a2c |
| 378 | GS000016197-ASM    | Kyrgyz3  | Kyrgyz         | R1a2c |
| 379 | GS000013758-ASM    | Shugn1   | Shugnan        | R1a2d |
| 380 | GS000035114-ASM    | Cirkas3  | Circassians    | R1a2d |
| 381 | GS000016974-ASM    | Israel42 | Mumbai-Jews    | R1a2d |
| 382 | GS000016171-ASM    | Balkar2  | Balkars        | R1a2d |
| 383 | GS000016188-ASM    | RVnch1   | Rushan-Vanch   | R1a2d |
| 384 | GS000035237-ASM    | Azerb24  | Azerbaijanis   | R1a2d |
| 385 | GS000016192-ASM    | Tajik1   | Tajiks         | R1b15 |
| 386 | GS000016134-ASM    | Bashk3   | Bashkirs       | R1b13 |
| 387 | GS000035234-ASM    | Mong4    | Mongol-Khalkh  | R1b13 |
| 388 | GS000014406-ASM    | Avar9    | Avars          | R1b11 |
| 389 | GS000016032-ASM    | huC92BC9 | US             | R1b11 |
| 390 | GS000016881-ASM    | Israel43 | Kurdistan-Jews | R1b11 |
| 391 | GS000016133-ASM    | ISR31    | Turkey-Jews    | R1b11 |
| 392 | GS000016886-ASM    | Israel48 | Moroccan-Jews  | R1b11 |
| 393 | GS000014364-ASM    | Tabas17  | Tabasarans     | R1b11 |
| 394 | GS000035173-ASM    | Armen1   | Armenians      | R1b11 |
| 395 | GS000013750-ASM    | Assyr3   | Assyrians      | R1b11 |
| 396 | GS000014559-ASM    | hu297562 | NA             | R1b11 |
| 397 | GS000012713-ASM    | hu470099 | NA             | R1b17 |
| 398 | GS000011807-ASM    | hu241DEA | US             | R1b18 |
| 399 | GS000015189-ASM    | hu79F922 | US             | R1b18 |
| 400 | GS000015227-ASM    | huAFA81C | NA             | R1b8  |
| 401 | GS000035175-ASM    | UkrnW1   | Ukrainians     | R1b8  |
| 402 | GS000009932-ASM    | huD81F3D | NA             | R1b6  |
| 403 | GS000016334-ASM    | huC3160A | NA             | R1b6  |
| 404 | GS000015885-ASM    | hu2843C9 | US             | R1b6  |
| 405 | GS000009920-ASM    | huBA30D4 | NA             | R1b6  |
| 406 | GS000016014-ASM    | huEBD467 | NA             | R1b6  |
| 407 | GS000009926-ASM    | hu0E64A1 | NA             | R1b   |
| 408 | GS000016029-ASM    | hu68929D | NA             | R1b6  |
| 409 | GS000012712-ASM    | huDBD591 | NA             | R1b6  |

|     |                            |            |                  |      |
|-----|----------------------------|------------|------------------|------|
| 410 | GS00253-DNA_A01_200_37-ASM | hu43860C   | NA               | R1b6 |
| 411 | GS000015155-ASM            | hu7B594C   | NA               | R1b6 |
| 412 | GS000009931-ASM            | huC29627   | US               | R1b6 |
| 413 | GS000015175-ASM            | huFE71F3   | NA               | R1b6 |
| 414 | GS000006909-ASM            | huA90CE6   | US               | R1b6 |
| 415 | GS000011740-ASM            | huAEC1B0   | NA               | R1b6 |
| 416 | GS000020414-ASM            | hu48C4EB   | US               | R1b6 |
| 417 | GS000015710-ASM            | hu432EB5   | US               | R1b3 |
| 418 | GS000016891-ASM            | Ger3       | Germans          | R1b3 |
| 419 | PS_GS000016891-ASM         | Ger3       | Germans          | R1b3 |
| 420 | GS000015711-ASM            | Pur_4      | Puerto-Ricans    | R1b3 |
| 421 | HG00731-200-37-ASM         | PUR_1      | Puerto-Ricans    | R1b3 |
| 422 | GS000010437-ASM            | hu2FEC01   | US               | R1b3 |
| 423 | GS000019959-ASM            | AndT7      | Colla, Andean-HA | R1b3 |
| 424 | GS000019988-ASM            | AndT13     | Colla, Andean-HA | R1b3 |
| 425 | GS000016375-ASM            | huA05317   | US               | R1b3 |
| 426 | GS000011814-ASM            | huF5AD12   | NA               | R1b3 |
| 427 | GS000015229-ASM            | Fra1       | French           | R1b3 |
| 428 | GS000010426-ASM            | huFAF983   | NA               | R1b3 |
| 429 | GS000015874-ASM            | Mord1      | Mordvins         | R1b3 |
| 430 | GS000016015-ASM            | hu599905   | NA               | R1b3 |
| 431 | GS000015884-ASM            | hu1378E3   | NA               | R1b3 |
| 432 | GS000010436-ASM            | hu3CAB43   | US               | R1b1 |
| 433 | NA20509-200-37-ASM         | TSI_2      | Italians         | R1b1 |
| 434 | GS000014568-ASM            | hu72C17A   | NA               | R1b1 |
| 435 | GS000016030-ASM            | hu3A8D13   | NA               | R1b1 |
| 436 | GS000011738-ASM            | hu7DCBF9   | US               | R1b1 |
| 437 | GS000016885-ASM            | CArab2     | Arab-Christian   | R1b1 |
| 438 | GS000016333-ASM            | huED0F40   | US               | R1b1 |
| 439 | NA07357-200-37-ASM         | CEU_3      | NW-Europeans     | R1b1 |
| 440 | GS000016139-ASM            | ISR38      | Ashkenazi-Jews   | R1b1 |
| 441 | GS000014563-ASM            | hu19C09F   | US               | R1b1 |
| 442 | NA19649-200-37-ASM         | MXL_3      | Mexicans         | R1b1 |
| 443 | GS000011809-ASM            | huC14AE1   | US               | R1b1 |
| 444 | GS000015233-ASM            | Port1      | Portugese        | R1b3 |
| 445 | GS000016027-ASM            | hu589D0B   | US               | R1b6 |
| 446 | GS000011737-ASM            | hu2C1D94   | US               | R1b5 |
| 447 | GS000015186-ASM            | hu0D879F   | NA               | R1b5 |
| 448 | GS000015223-ASM            | hu64DBF7   | US               | R1b5 |
| 449 | NA12889-L2-200-37-ASM      | CEPH_13    | NW-Europeans     | R1b5 |
| 450 | NA12882-200-37-ASM         | ped_1463_6 | CEPH-pedigree    | R1b5 |
| 451 | NA12883-200-37-ASM         | ped_1463_7 | CEPH-pedigree    | R1b5 |

|     |                       |             |                 |      |
|-----|-----------------------|-------------|-----------------|------|
| 452 | NA12884-200-37-ASM    | ped_1463_8  | CEPH-pedigree   | R1b5 |
| 453 | NA12886-L2-200-37-ASM | ped_1463_10 | CEPH-pedigree   | R1b5 |
| 454 | NA12877-200-37-ASM    | ped_1463_1  | CEPH-pedigree   | R1b5 |
| 455 | NA12888-200-37-ASM    | ped_1463_12 | CEPH-pedigree   | R1b5 |
| 456 | NA12893-200-37-ASM    | ped_1463_17 | CEPH-pedigree   | R1b5 |
| 457 | GS000010323-ASM       | hu050E9C    | NA              | R1b2 |
| 458 | GS000014565-ASM       | hu4BE6F2    | US              | R1b2 |
| 459 | GS000011810-ASM       | hu7852C5    | US              | R1b2 |
| 460 | GS000020420-ASM       | hu3073E3    | NA              | R1b2 |
| 461 | GS000010425-ASM       | hu4339C0    | US              | R1b2 |
| 462 | GS000015191-ASM       | huBE0B25    | NA              | R1b2 |
| 463 | GS000011739-ASM       | UK1         | British         | R1b2 |
| 464 | GS000015221-ASM       | huEA4EE5    | Latino/Hispanic | R1b2 |
| 465 | GS000016031-ASM       | huDE435D    | NA              | R1b2 |
| 466 | GS000016371-ASM       | hu4B0812    | US              | R1b2 |
| 467 | GS000011761-ASM       | huF5E0B6    | NA              | R1b2 |
| 468 | GS000016028-ASM       | hu8E2A35    | NA              | R1b2 |
| 469 | NA10851-200-37-ASM    | CEU_4       | NW-Europeans    | R1b2 |
| 470 | GS000015152-ASM       | hu44DCFF    | US              | R1b2 |
| 471 | GS000015178-ASM       | hu619F51    | US              | R1b2 |
| 472 | GS000009928-ASM       | huBAAC98    | NA              | R1b2 |
| 473 | GS000009930-ASM       | huA4E2CF    | NA              | R1b2 |
| 474 | GS000014569-ASM       | hu5FB1B9    | NA              | R1b2 |

---

**Table S7. Age estimates of Y chromosome clades reported in Figure S3**

No - node number, Name - node name, Post - posterior support to the clade, Age - average age estimate (years), using  $0.74 \times 10^{-9}$  mutations/base/year mutation rate (see SI3 for further details), Lower - lower 95% boundary, Upper - upper 95% boundary of the age estimate, a - considering only the variance of branch length estimation in BEAST, b - considering also the uncertainty due to the confidence intervals of the mutation rate  $0.63-0.95 \times 10^{-9}$

| No | Name  | Post | Age     | Lower <sup>a</sup> | Upper <sup>a</sup> | Lower <sup>b</sup> | Upper <sup>b</sup> |
|----|-------|------|---------|--------------------|--------------------|--------------------|--------------------|
| 1  | root  | 1.00 | 253,884 | 246,325            | 261,464            | 191,875            | 307,116            |
| 2  | AT    | 1.00 | 148,050 | 143,587            | 152,696            | 111,847            | 179,357            |
| 3  | BT    | 1.00 | 99,802  | 96,540             | 103,109            | 75,200             | 121,113            |
| 4  | DT    | 1.00 | 71,760  | 69,777             | 73,799             | 54,353             | 86,685             |
| 5  | CT    | 1.00 | 71,048  | 69,043             | 73,054             | 53,781             | 85,810             |
| 6  | GT    | 1.00 | 51,557  | 50,206             | 52,911             | 39,108             | 62,150             |
| 7  | HT    | 0.80 | 51,328  | 50,004             | 52,630             | 38,951             | 61,820             |
| 8  | IT    | 1.00 | 50,460  | 49,208             | 51,729             | 38,331             | 60,761             |
| 9  | K     | 1.00 | 48,995  | 47,746             | 50,210             | 37,192             | 58,977             |
| 10 | NR    | 0.29 | 48,871  | 47,622             | 50,085             | 37,095             | 58,831             |
| 11 | MR    | 1.00 | 48,572  | 47,287             | 49,812             | 36,834             | 58,510             |
| 12 | P     | 1.00 | 48,142  | 46,813             | 49,445             | 36,465             | 58,079             |
| 13 | P1    | 1.00 | 35,282  | 33,662             | 36,917             | 26,221             | 43,362             |
| 14 | R     | 1.00 | 28,891  | 27,240             | 30,540             | 21,219             | 35,873             |
| 15 | R1    | 1.00 | 23,729  | 22,151             | 25,314             | 17,255             | 29,734             |
| 16 | R1a   | 1.00 | 5,884   | 5,418              | 6,592              | 4,220              | 7,743              |
| 17 | R1a2  | 1.00 | 5,556   | 5,132              | 6,240              | 3,997              | 7,330              |
| 18 |       | 0.32 | 5,409   | 5,051              | 5,782              | 3,934              | 6,792              |
| 19 |       | 0.08 | 5,343   | 4,979              | 5,716              | 3,878              | 6,714              |
| 20 |       | 0.06 | 5,206   | 4,806              | 5,592              | 3,744              | 6,569              |
| 21 |       | 0.04 | 5,144   | 4,737              | 5,548              | 3,690              | 6,516              |
| 22 |       | 0.13 | 4,986   | 4,488              | 5,465              | 3,496              | 6,419              |
| 23 | R1a2a | 1.00 | 4,339   | 3,570              | 5,036              | 2,781              | 5,915              |
| 24 |       | 1.00 | 833     | 504                | 1,296              | 393                | 1,522              |
| 25 |       | 1.00 | 546     | 239                | 847                | 186                | 994                |
| 26 |       | 1.00 | 578     | 255                | 925                | 199                | 1,087              |
| 27 |       | 0.09 | 5,084   | 4,592              | 5,546              | 3,577              | 6,514              |
| 28 |       | 1.00 | 1,241   | 783                | 1,770              | 610                | 2,079              |
| 29 |       | 1.00 | 690     | 433                | 998                | 337                | 1,173              |
| 30 |       | 0.39 | 587     | 337                | 861                | 263                | 1,011              |
| 31 |       | 1.00 | 4,829   | 4,315              | 5,287              | 3,361              | 6,210              |
| 32 |       | 0.40 | 4,702   | 4,131              | 5,164              | 3,218              | 6,066              |
| 33 |       | 1.00 | 4,236   | 3,633              | 4,823              | 2,830              | 5,665              |
| 34 |       | 1.00 | 3,860   | 3,267              | 4,487              | 2,545              | 5,271              |
| 35 |       | 1.00 | 3,372   | 2,767              | 4,004              | 2,155              | 4,703              |

|    |         |      |        |        |        |        |        |
|----|---------|------|--------|--------|--------|--------|--------|
| 36 |         | 0.99 | 3,091  | 2,467  | 3,748  | 1,922  | 4,403  |
| 37 |         | 1.00 | 3,431  | 2,772  | 4,107  | 2,159  | 4,824  |
| 38 |         | 1.00 | 3,292  | 2,501  | 4,078  | 1,948  | 4,790  |
| 39 |         | 0.86 | 5,325  | 4,938  | 5,737  | 3,846  | 6,738  |
| 40 |         | 0.71 | 5,076  | 4,497  | 5,559  | 3,503  | 6,530  |
| 41 |         | 0.34 | 4,935  | 4,314  | 5,430  | 3,360  | 6,378  |
| 42 |         | 1.00 | 649    | 331    | 1,077  | 257    | 1,265  |
| 43 |         | 0.99 | 4,727  | 4,000  | 5,282  | 3,116  | 6,204  |
| 44 | R1a1    | 1.00 | 5,538  | 5,127  | 6,052  | 3,994  | 7,109  |
| 45 |         | 0.29 | 5,451  | 5,052  | 5,929  | 3,936  | 6,964  |
| 46 |         | 1.00 | 5,298  | 4,889  | 5,752  | 3,809  | 6,756  |
| 47 |         | 1.00 | 4,558  | 3,910  | 5,098  | 3,046  | 5,988  |
| 48 |         | 1.00 | 4,314  | 3,640  | 4,914  | 2,835  | 5,773  |
| 49 |         | 0.34 | 4,180  | 3,481  | 4,813  | 2,711  | 5,653  |
| 50 |         | 1.00 | 2,242  | 1,720  | 2,808  | 1,340  | 3,299  |
| 51 |         | 1.00 | 1,810  | 1,285  | 2,366  | 1,001  | 2,779  |
| 52 |         | 1.00 | 1,452  | 911    | 2,009  | 710    | 2,360  |
| 53 |         | 0.99 | 2,011  | 1,492  | 2,572  | 1,162  | 3,022  |
| 54 |         | 1.00 | 2,638  | 1,938  | 3,360  | 1,509  | 3,947  |
| 55 |         | 1.00 | 4,970  | 4,505  | 5,457  | 3,509  | 6,410  |
| 56 |         | 1.00 | 4,048  | 3,437  | 4,720  | 2,677  | 5,544  |
| 57 |         | 1.00 | 3,624  | 2,999  | 4,337  | 2,336  | 5,094  |
| 58 |         | 1.00 | 2,097  | 1,517  | 2,697  | 1,182  | 3,168  |
| 59 |         | 0.55 | 3,809  | 3,149  | 4,583  | 2,453  | 5,383  |
| 60 |         | 1.00 | 3,353  | 2,610  | 4,154  | 2,033  | 4,879  |
| 61 |         | 1.00 | 2,905  | 2,299  | 3,550  | 1,791  | 4,170  |
| 62 |         | 1.00 | 2,325  | 1,730  | 2,928  | 1,348  | 3,439  |
| 63 |         | 1.00 | 4,837  | 4,216  | 5,394  | 3,284  | 6,336  |
| 64 |         | 1.00 | 3,973  | 3,249  | 4,708  | 2,531  | 5,530  |
| 65 | R1b     | 1.00 | 20,912 | 19,361 | 22,491 | 15,081 | 26,418 |
| 66 | R1b1'13 | 1.00 | 15,802 | 14,439 | 17,305 | 11,247 | 20,326 |
| 67 | R1b1'11 | 1.00 | 6,641  | 5,977  | 7,360  | 4,656  | 8,645  |
| 68 | R1b1'19 | 1.00 | 5,465  | 5,062  | 5,868  | 3,943  | 6,892  |
| 69 | R1b1'5  | 0.99 | 5,323  | 4,944  | 5,677  | 3,851  | 6,668  |
| 70 |         | 0.17 | 5,264  | 4,886  | 5,609  | 3,806  | 6,588  |
| 71 |         | 0.24 | 5,181  | 4,792  | 5,532  | 3,732  | 6,498  |
| 72 | R1b3    | 1.00 | 5,018  | 4,606  | 5,402  | 3,588  | 6,345  |
| 73 |         | 0.32 | 4,885  | 4,423  | 5,304  | 3,445  | 6,230  |
| 74 |         | 0.26 | 4,799  | 4,280  | 5,266  | 3,334  | 6,185  |
| 75 |         | 1.00 | 538    | 194    | 858    | 151    | 1,007  |
| 76 |         | 0.92 | 4,762  | 4,265  | 5,226  | 3,322  | 6,138  |
| 77 | R1b1    | 0.99 | 4,973  | 4,528  | 5,389  | 3,527  | 6,329  |
| 78 |         | 0.37 | 4,847  | 4,353  | 5,304  | 3,391  | 6,230  |

|     |          |      |        |        |        |        |        |
|-----|----------|------|--------|--------|--------|--------|--------|
| 79  |          | 1.00 | 4,758  | 4,233  | 5,215  | 3,297  | 6,125  |
| 80  | R1b11    | 1.00 | 5,359  | 4,819  | 5,893  | 3,754  | 6,923  |
| 81  |          | 0.40 | 5,218  | 4,663  | 5,734  | 3,632  | 6,735  |
| 82  |          | 1.00 | 4,694  | 3,953  | 5,293  | 3,079  | 6,217  |
| 83  |          | 1.00 | 2,379  | 1,620  | 3,213  | 1,262  | 3,775  |
| 84  | R2a      | 1.00 | 8,596  | 7,534  | 9,680  | 5,869  | 11,370 |
| 85  |          | 0.38 | 8,465  | 7,408  | 9,504  | 5,770  | 11,163 |
| 86  |          | 1.00 | 5,177  | 4,447  | 5,928  | 3,464  | 6,963  |
| 87  |          | 1.00 | 2,465  | 1,703  | 3,290  | 1,327  | 3,864  |
| 88  | Q        | 1.00 | 28,894 | 27,324 | 30,430 | 21,284 | 35,743 |
| 89  | Q1       | 1.00 | 22,806 | 21,325 | 24,372 | 16,611 | 28,628 |
| 90  |          | 1.00 | 17,445 | 16,252 | 18,683 | 12,660 | 21,945 |
| 91  | Q1a-M3   | 1.00 | 15,444 | 14,390 | 16,480 | 11,209 | 19,358 |
| 92  | Q1a-M848 | 1.00 | 15,035 | 14,008 | 16,050 | 10,911 | 18,853 |
| 93  |          | 0.14 | 14,889 | 13,887 | 15,931 | 10,817 | 18,713 |
| 94  |          | 0.11 | 14,771 | 13,683 | 15,804 | 10,659 | 18,563 |
| 95  |          | 0.17 | 14,674 | 13,540 | 15,748 | 10,547 | 18,498 |
| 96  |          | 1.00 | 1,825  | 1,252  | 2,471  | 975    | 2,902  |
| 97  |          | 0.41 | 1,647  | 1,083  | 2,271  | 843    | 2,668  |
| 98  |          | 1.00 | 423    | 117    | 716    | 91     | 842    |
| 99  |          | 0.87 | 14,632 | 13,525 | 15,721 | 10,535 | 18,466 |
| 100 |          | 1.00 | 899    | 485    | 1,494  | 378    | 1,755  |
| 101 |          | 1.00 | 12,474 | 11,209 | 13,695 | 8,731  | 16,086 |
| 102 | Q1c      | 1.00 | 8,506  | 7,336  | 9,699  | 5,715  | 11,392 |
| 103 |          | 1.00 | 5,068  | 4,328  | 5,793  | 3,371  | 6,805  |
| 104 |          | 1.00 | 2,764  | 2,037  | 3,502  | 1,587  | 4,113  |
| 105 | Q1d-B285 | 1.00 | 9,882  | 8,443  | 11,418 | 6,577  | 13,411 |
| 106 | Q2       | 1.00 | 26,481 | 24,877 | 28,126 | 19,378 | 33,037 |
| 107 | Q2b'c    | 1.00 | 16,781 | 15,120 | 18,453 | 11,778 | 21,675 |
| 108 | Q2b-B280 | 1.00 | 958    | 597    | 1,441  | 465    | 1,693  |
| 109 |          | 1.00 | 636    | 356    | 970    | 278    | 1,139  |
| 110 |          | 1.00 | 152    | 15     | 378    | 11     | 444    |
| 111 |          | 1.00 | 651    | 384    | 968    | 299    | 1,138  |
| 112 |          | 0.44 | 537    | 259    | 807    | 202    | 948    |
| 113 | MS       | 1.00 | 47,932 | 46,495 | 49,258 | 36,217 | 57,859 |
| 114 | S        | 1.00 | 47,628 | 46,123 | 49,024 | 35,928 | 57,584 |
| 115 |          | 1.00 | 1,102  | 601    | 1,718  | 468    | 2,018  |
| 116 | S1'2     | 0.52 | 47,429 | 45,838 | 48,873 | 35,706 | 57,406 |
| 117 | M1c      | 1.00 | 5,443  | 4,633  | 6,600  | 3,609  | 7,752  |
| 118 |          | 1.00 | 1,949  | 1,325  | 2,616  | 1,032  | 3,073  |
| 119 | NO       | 1.00 | 41,900 | 40,175 | 43,591 | 31,294 | 51,202 |
| 120 | N        | 1.00 | 19,153 | 17,559 | 20,792 | 13,677 | 24,422 |
| 121 | N1'3     | 1.00 | 17,609 | 16,111 | 19,157 | 12,549 | 22,502 |

|     |        |      |        |        |        |       |        |
|-----|--------|------|--------|--------|--------|-------|--------|
| 122 | N3     | 1.00 | 11,659 | 10,440 | 12,936 | 8,133 | 15,195 |
| 123 | N3a    | 1.00 | 8,374  | 7,468  | 9,310  | 5,817 | 10,936 |
| 124 | N3a2'5 | 1.00 | 7,147  | 6,369  | 7,951  | 4,961 | 9,340  |
| 125 | N3a3'5 | 1.00 | 5,228  | 4,790  | 5,645  | 3,731 | 6,631  |
| 126 |        | 0.33 | 5,119  | 4,691  | 5,538  | 3,654 | 6,505  |
| 127 | N3a5   | 1.00 | 4,882  | 4,419  | 5,348  | 3,442 | 6,282  |
| 128 |        | 1.00 | 2,739  | 2,117  | 3,392  | 1,649 | 3,985  |
| 129 |        | 1.00 | 929    | 606    | 1,356  | 472   | 1,593  |
| 130 |        | 1.00 | 699    | 451    | 1,006  | 352   | 1,181  |
| 131 |        | 0.49 | 582    | 329    | 864    | 256   | 1,014  |
| 132 |        | 1.00 | 503    | 176    | 796    | 137   | 935    |
| 133 |        | 1.00 | 2,687  | 2,173  | 3,245  | 1,692 | 3,811  |
| 134 |        | 1.00 | 2,226  | 1,774  | 2,709  | 1,382 | 3,182  |
| 135 |        | 0.28 | 2,130  | 1,681  | 2,593  | 1,309 | 3,045  |
| 136 |        | 1.00 | 1,836  | 1,383  | 2,322  | 1,077 | 2,728  |
| 137 |        | 1.00 | 719    | 433    | 1,087  | 337   | 1,277  |
| 138 | N3a4   | 1.00 | 4,112  | 3,396  | 4,846  | 2,645 | 5,692  |
| 139 |        | 1.00 | 3,167  | 2,416  | 3,973  | 1,882 | 4,667  |
| 140 |        | 1.00 | 1,582  | 959    | 2,251  | 747   | 2,644  |
| 141 | N3a3   | 1.00 | 4,931  | 4,455  | 5,383  | 3,470 | 6,322  |
| 142 |        | 1.00 | 4,291  | 3,707  | 4,875  | 2,887 | 5,726  |
| 143 |        | 1.00 | 3,049  | 2,456  | 3,665  | 1,913 | 4,305  |
| 144 |        | 1.00 | 2,774  | 2,226  | 3,347  | 1,734 | 3,931  |
| 145 |        | 0.44 | 2,617  | 2,076  | 3,204  | 1,617 | 3,763  |
| 146 |        | 1.00 | 2,126  | 1,536  | 2,734  | 1,197 | 3,211  |
| 147 |        | 1.00 | 2,480  | 1,947  | 3,036  | 1,516 | 3,566  |
| 148 |        | 1.00 | 1,419  | 819    | 2,021  | 638   | 2,374  |
| 149 |        | 1.00 | 2,222  | 1,710  | 2,776  | 1,332 | 3,261  |
| 150 | N3a2   | 1.00 | 4,739  | 3,796  | 5,475  | 2,957 | 6,431  |
| 151 |        | 1.00 | 1,589  | 1,054  | 2,197  | 821   | 2,580  |
| 152 |        | 1.00 | 828    | 525    | 1,218  | 409   | 1,430  |
| 153 |        | 1.00 | 627    | 375    | 945    | 292   | 1,110  |
| 154 | N3a1   | 1.00 | 4,719  | 3,774  | 5,444  | 2,940 | 6,395  |
| 155 |        | 1.00 | 2,237  | 1,599  | 2,921  | 1,245 | 3,431  |
| 156 |        | 1.00 | 1,461  | 919    | 2,044  | 716   | 2,400  |
| 157 | N2a1   | 1.00 | 5,061  | 4,488  | 5,604  | 3,496 | 6,582  |
| 158 | N2a1a  | 1.00 | 3,615  | 3,010  | 4,279  | 2,345 | 5,027  |
| 159 |        | 0.33 | 3,488  | 2,873  | 4,134  | 2,238 | 4,855  |
| 160 |        | 1.00 | 2,524  | 1,924  | 3,129  | 1,499 | 3,675  |
| 161 |        | 1.00 | 1,837  | 1,307  | 2,402  | 1,018 | 2,821  |
| 162 |        | 1.00 | 760    | 447    | 1,191  | 348   | 1,399  |
| 163 |        | 1.00 | 1,180  | 637    | 1,770  | 496   | 2,079  |
| 164 |        | 1.00 | 1,715  | 1,210  | 2,259  | 942   | 2,653  |

|     |          |      |        |        |        |        |        |
|-----|----------|------|--------|--------|--------|--------|--------|
| 165 |          | 1.00 | 1,467  | 1,006  | 1,990  | 784    | 2,337  |
| 166 |          | 0.36 | 4,923  | 4,359  | 5,488  | 3,396  | 6,446  |
| 167 |          | 1.00 | 3,023  | 2,299  | 3,790  | 1,791  | 4,452  |
| 168 | O        | 1.00 | 34,042 | 32,387 | 35,708 | 25,228 | 41,942 |
| 169 | O1'2     | 1.00 | 33,103 | 31,401 | 34,781 | 24,460 | 40,854 |
| 170 | O2a      | 1.00 | 10,789 | 9,502  | 12,211 | 7,402  | 14,343 |
| 171 | O2a2     | 1.00 | 5,965  | 5,312  | 7,013  | 4,138  | 8,238  |
| 172 |          | 0.67 | 5,747  | 5,155  | 6,780  | 4,015  | 7,964  |
| 173 |          | 1.00 | 5,322  | 4,682  | 6,309  | 3,647  | 7,410  |
| 174 |          | 0.68 | 5,588  | 4,961  | 6,650  | 3,865  | 7,811  |
| 175 |          | 1.00 | 5,349  | 4,707  | 6,316  | 3,667  | 7,419  |
| 176 |          | 1.00 | 1,588  | 1,004  | 2,221  | 782    | 2,609  |
| 177 | O2a1     | 1.00 | 5,735  | 4,869  | 7,032  | 3,793  | 8,259  |
| 178 | O1       | 1.00 | 16,538 | 15,091 | 18,003 | 11,755 | 21,147 |
| 179 | O1c-B398 | 1.00 | 5,590  | 4,917  | 6,452  | 3,830  | 7,579  |
| 180 |          | 1.00 | 4,868  | 4,138  | 5,497  | 3,223  | 6,456  |
| 181 |          | 1.00 | 4,551  | 3,777  | 5,191  | 2,942  | 6,097  |
| 182 |          | 0.35 | 16,392 | 14,984 | 17,890 | 11,672 | 21,014 |
| 183 | O3       | 1.00 | 24,824 | 23,125 | 26,538 | 18,013 | 31,172 |
| 184 | O3a'i    | 1.00 | 20,773 | 19,190 | 22,365 | 14,948 | 26,270 |
| 185 | O3a'b    | 1.00 | 18,203 | 16,626 | 19,783 | 12,951 | 23,237 |
| 186 | O3a1     | 1.00 | 7,455  | 6,514  | 8,500  | 5,074  | 9,984  |
| 187 |          | 1.00 | 5,491  | 4,923  | 6,164  | 3,834  | 7,240  |
| 188 |          | 0.32 | 5,390  | 4,835  | 6,067  | 3,767  | 7,127  |
| 189 |          | 1.00 | 4,645  | 3,926  | 5,268  | 3,058  | 6,188  |
| 190 | O3i-B451 | 1.00 | 5,511  | 4,667  | 6,803  | 3,636  | 7,991  |
| 191 | LT       | 1.00 | 45,610 | 43,844 | 47,299 | 34,152 | 55,558 |
| 192 | L1b-M349 | 1.00 | 7,545  | 5,926  | 9,120  | 4,616  | 10,712 |
| 193 | IJ       | 1.00 | 45,439 | 43,735 | 47,100 | 34,067 | 55,324 |
| 194 | J        | 1.00 | 33,417 | 31,738 | 35,176 | 24,722 | 41,318 |
| 195 | J1       | 1.00 | 18,734 | 17,249 | 20,273 | 13,436 | 23,812 |
| 196 |          | 0.92 | 18,506 | 17,049 | 20,057 | 13,281 | 23,559 |
| 197 | J1b      | 1.00 | 7,348  | 6,417  | 8,354  | 4,999  | 9,812  |
| 198 |          | 1.00 | 5,618  | 5,084  | 6,269  | 3,960  | 7,364  |
| 199 |          | 1.00 | 5,251  | 4,789  | 5,725  | 3,731  | 6,725  |
| 200 |          | 1.00 | 4,819  | 4,282  | 5,322  | 3,335  | 6,251  |
| 201 |          | 1.00 | 4,082  | 3,452  | 4,745  | 2,689  | 5,574  |
| 202 |          | 1.00 | 3,717  | 3,043  | 4,437  | 2,370  | 5,211  |
| 203 |          | 1.00 | 3,579  | 2,862  | 4,341  | 2,230  | 5,098  |
| 204 |          | 0.46 | 5,097  | 4,599  | 5,579  | 3,582  | 6,553  |
| 205 |          | 1.00 | 4,398  | 3,598  | 5,055  | 2,802  | 5,937  |
| 206 | J1a      | 1.00 | 5,558  | 5,011  | 6,285  | 3,903  | 7,383  |
| 207 |          | 0.93 | 5,368  | 4,815  | 5,998  | 3,750  | 7,045  |

|     |          |      |        |        |        |        |        |
|-----|----------|------|--------|--------|--------|--------|--------|
| 208 |          | 1.00 | 5,117  | 4,566  | 5,725  | 3,556  | 6,724  |
| 209 | J2       | 1.00 | 30,261 | 28,570 | 32,006 | 22,254 | 37,594 |
| 210 | J2a      | 1.00 | 19,494 | 18,067 | 20,953 | 14,073 | 24,611 |
| 211 |          | 1.00 | 17,090 | 15,901 | 18,365 | 12,386 | 21,571 |
| 212 |          | 1.00 | 16,728 | 15,482 | 17,962 | 12,060 | 21,098 |
| 213 |          | 1.00 | 9,315  | 8,141  | 10,490 | 6,341  | 12,322 |
| 214 |          | 1.00 | 8,411  | 7,251  | 9,557  | 5,648  | 11,226 |
| 215 |          | 1.00 | 15,235 | 13,979 | 16,496 | 10,889 | 19,376 |
| 216 |          | 1.00 | 13,229 | 11,854 | 14,650 | 9,234  | 17,208 |
| 217 | J2b      | 1.00 | 16,315 | 14,700 | 18,041 | 11,451 | 21,191 |
| 218 |          | 1.00 | 4,991  | 4,102  | 5,775  | 3,195  | 6,783  |
| 219 | I        | 1.00 | 29,435 | 27,460 | 31,383 | 21,390 | 36,863 |
| 220 | I2'3     | 1.00 | 24,240 | 22,287 | 26,249 | 17,361 | 30,832 |
| 221 | I2a-L621 | 1.00 | 2,549  | 2,062  | 3,088  | 1,606  | 3,628  |
| 222 |          | 0.19 | 2,403  | 1,933  | 2,902  | 1,506  | 3,409  |
| 223 |          | 0.09 | 2,323  | 1,863  | 2,832  | 1,451  | 3,327  |
| 224 |          | 0.13 | 2,274  | 1,780  | 2,806  | 1,387  | 3,296  |
| 225 |          | 1.00 | 1,174  | 663    | 1,698  | 516    | 1,994  |
| 226 |          | 1.00 | 2,031  | 1,530  | 2,553  | 1,192  | 2,999  |
| 227 |          | 1.00 | 802    | 458    | 1,257  | 357    | 1,476  |
| 228 | I1a'f    | 1.00 | 5,542  | 5,045  | 6,138  | 3,930  | 7,210  |
| 229 |          | 0.43 | 5,401  | 4,887  | 5,978  | 3,807  | 7,021  |
| 230 |          | 1.00 | 4,672  | 3,980  | 5,255  | 3,100  | 6,173  |
| 231 |          | 1.00 | 3,210  | 2,468  | 3,988  | 1,922  | 4,685  |
| 232 |          | 1.00 | 4,950  | 4,395  | 5,479  | 3,424  | 6,436  |
| 233 |          | 1.00 | 4,621  | 3,959  | 5,178  | 3,084  | 6,082  |
| 234 | H        | 1.00 | 48,486 | 46,991 | 49,972 | 36,603 | 58,698 |
| 235 | H1'2     | 1.00 | 43,837 | 42,065 | 45,598 | 32,767 | 53,559 |
| 236 | H1       | 1.00 | 40,662 | 38,837 | 42,519 | 30,252 | 49,943 |
| 237 | H1a      | 1.00 | 16,870 | 15,111 | 18,718 | 11,770 | 21,986 |
| 238 |          | 1.00 | 6,605  | 5,654  | 7,630  | 4,404  | 8,962  |
| 239 |          | 1.00 | 5,229  | 4,499  | 6,024  | 3,504  | 7,076  |
| 240 |          | 1.00 | 5,596  | 4,826  | 6,695  | 3,759  | 7,864  |
| 241 | H1b      | 1.00 | 31,899 | 29,934 | 33,789 | 23,317 | 39,689 |
| 242 |          | 1.00 | 29,950 | 27,964 | 31,895 | 21,783 | 37,464 |
| 243 | G2a      | 1.00 | 19,405 | 17,781 | 21,079 | 13,850 | 24,759 |
| 244 | G2a1     | 1.00 | 5,993  | 5,111  | 7,073  | 3,981  | 8,308  |
| 245 |          | 1.00 | 4,838  | 4,033  | 5,549  | 3,142  | 6,518  |
| 246 |          | 1.00 | 3,258  | 2,544  | 3,992  | 1,982  | 4,688  |
| 247 |          | 1.00 | 677    | 394    | 1,042  | 307    | 1,224  |
| 248 |          | 1.00 | 18,807 | 17,175 | 20,443 | 13,379 | 24,012 |
| 249 | G2a2     | 1.00 | 11,357 | 9,837  | 12,901 | 7,663  | 15,153 |
| 250 | C        | 1.00 | 50,865 | 49,191 | 52,699 | 38,317 | 61,900 |

|     |       |      |        |        |        |        |        |
|-----|-------|------|--------|--------|--------|--------|--------|
| 251 | C3    | 1.00 | 35,383 | 33,305 | 37,537 | 25,943 | 44,092 |
| 252 | C3c'h | 1.00 | 15,959 | 14,785 | 17,116 | 11,517 | 20,105 |
| 253 |       | 0.59 | 15,680 | 14,555 | 16,839 | 11,337 | 19,779 |
| 254 |       | 0.51 | 15,557 | 14,443 | 16,732 | 11,250 | 19,654 |
| 255 | C3c   | 1.00 | 12,131 | 10,916 | 13,363 | 8,503  | 15,697 |
| 256 |       | 1.00 | 2,804  | 2,228  | 3,431  | 1,735  | 4,030  |
| 257 |       | 1.00 | 1,674  | 1,190  | 2,205  | 927    | 2,590  |
| 258 |       | 1.00 | 803    | 528    | 1,148  | 411    | 1,349  |
| 259 |       | 1.00 | 598    | 366    | 873    | 285    | 1,026  |
| 260 |       | 1.00 | 563    | 196    | 915    | 153    | 1,075  |
| 261 |       | 1.00 | 2,562  | 2,003  | 3,161  | 1,560  | 3,713  |
| 262 |       | 1.00 | 1,792  | 1,255  | 2,376  | 978    | 2,791  |
| 263 |       | 1.00 | 4,992  | 4,188  | 5,732  | 3,262  | 6,732  |
| 264 |       | 1.00 | 3,812  | 3,005  | 4,654  | 2,341  | 5,467  |
| 265 |       | 1.00 | 594    | 285    | 939    | 222    | 1,103  |
| 266 | C3g   | 1.00 | 14,741 | 13,456 | 15,972 | 10,481 | 18,761 |
| 267 | C3f1  | 1.00 | 9,373  | 7,959  | 10,840 | 6,199  | 12,733 |
| 268 |       | 1.00 | 1,058  | 727    | 1,458  | 567    | 1,713  |
| 269 |       | 1.00 | 866    | 618    | 1,176  | 481    | 1,382  |
| 270 |       | 0.14 | 799    | 580    | 1,094  | 451    | 1,285  |
| 271 |       | 0.27 | 629    | 413    | 878    | 322    | 1,032  |
| 272 |       | 0.20 | 540    | 275    | 797    | 214    | 936    |
| 273 |       | 0.17 | 688    | 462    | 975    | 360    | 1,146  |
| 274 |       | 1.00 | 446    | 188    | 684    | 146    | 803    |
| 275 |       | 0.56 | 870    | 543    | 1,269  | 423    | 1,491  |
| 276 | C2'7  | 1.00 | 49,346 | 47,771 | 51,094 | 37,211 | 60,016 |
| 277 | C5'9  | 0.97 | 49,089 | 47,542 | 50,847 | 37,033 | 59,725 |
| 278 | C5'7  | 1.00 | 48,703 | 47,175 | 50,457 | 36,747 | 59,267 |
| 279 | C7    | 0.67 | 48,463 | 46,912 | 50,193 | 36,542 | 58,956 |
| 280 | C7b1  | 1.00 | 5,121  | 4,446  | 5,737  | 3,463  | 6,739  |
| 281 |       | 0.90 | 4,858  | 4,161  | 5,481  | 3,241  | 6,438  |
| 282 |       | 1.00 | 823    | 460    | 1,355  | 358    | 1,592  |
| 283 | C2    | 1.00 | 23,497 | 21,433 | 25,639 | 16,695 | 30,116 |
| 284 | C2a   | 1.00 | 12,609 | 10,893 | 14,446 | 8,485  | 16,968 |
| 285 |       | 1.00 | 831    | 507    | 1,270  | 395    | 1,492  |
| 286 |       | 1.00 | 583    | 317    | 877    | 247    | 1,030  |
| 287 | DE    | 1.00 | 68,555 | 66,457 | 70,676 | 51,766 | 83,017 |
| 288 | E     | 1.00 | 54,140 | 51,590 | 56,614 | 40,186 | 66,499 |
| 289 | E1'2  | 1.00 | 45,938 | 43,496 | 48,468 | 33,881 | 56,931 |
| 290 |       | 1.00 | 26,492 | 24,775 | 28,352 | 19,299 | 33,303 |
| 291 | E2a   | 1.00 | 13,823 | 12,334 | 15,355 | 9,607  | 18,036 |
| 292 |       | 1.00 | 12,839 | 11,414 | 14,391 | 8,891  | 16,904 |
| 293 |       | 1.00 | 4,833  | 3,963  | 5,452  | 3,087  | 6,404  |

|     |      |      |         |         |         |         |         |
|-----|------|------|---------|---------|---------|---------|---------|
| 294 |      | 0.39 | 4,693   | 3,799   | 5,306   | 2,959   | 6,233   |
| 295 |      | 1.00 | 3,484   | 2,644   | 4,350   | 2,059   | 5,110   |
| 296 |      | 0.98 | 4,450   | 3,520   | 5,130   | 2,742   | 6,025   |
| 297 |      | 1.00 | 144     | 3       | 492     | 2       | 578     |
| 298 | E2b  | 1.00 | 21,111  | 19,560  | 22,668  | 15,236  | 26,626  |
| 299 |      | 1.00 | 18,895  | 17,388  | 20,383  | 13,544  | 23,942  |
| 300 |      | 1.00 | 5,021   | 4,158   | 5,835   | 3,239   | 6,853   |
| 301 | E1a  | 1.00 | 10,811  | 9,523   | 12,138  | 7,418   | 14,258  |
| 302 |      | 1.00 | 5,247   | 4,728   | 5,731   | 3,683   | 6,731   |
| 303 |      | 1.00 | 4,824   | 4,278   | 5,319   | 3,332   | 6,248   |
| 304 |      | 0.35 | 4,724   | 4,144   | 5,227   | 3,228   | 6,140   |
| 305 |      | 1.00 | 3,102   | 2,393   | 3,805   | 1,864   | 4,469   |
| 306 |      | 0.48 | 5,063   | 4,529   | 5,583   | 3,528   | 6,558   |
| 307 |      | 1.00 | 6,594   | 5,502   | 7,619   | 4,286   | 8,949   |
| 308 |      | 1.00 | 4,994   | 4,223   | 5,700   | 3,289   | 6,696   |
| 309 |      | 1.00 | 4,113   | 3,371   | 4,906   | 2,626   | 5,762   |
| 310 |      | 1.00 | 2,925   | 2,227   | 3,661   | 1,735   | 4,300   |
| 311 | D    | 1.00 | 49,866  | 47,470  | 52,529  | 36,977  | 61,701  |
| 312 | D1   | 1.00 | 20,021  | 17,867  | 22,226  | 13,917  | 26,107  |
| 313 | B2'5 | 1.00 | 64,034  | 60,970  | 67,084  | 47,492  | 78,798  |
| 314 | B4'5 | 1.00 | 45,979  | 43,457  | 48,457  | 33,851  | 56,918  |
| 315 | B4   | 1.00 | 43,782  | 41,279  | 46,276  | 32,154  | 54,356  |
| 316 |      | 1.00 | 32,903  | 30,668  | 35,150  | 23,889  | 41,287  |
| 317 |      | 1.00 | 28,094  | 25,861  | 30,302  | 20,144  | 35,593  |
| 318 |      | 1.00 | 599     | 285     | 964     | 222     | 1,132   |
| 319 |      | 1.00 | 140     | 4       | 479     | 3       | 562     |
| 320 | B5   | 1.00 | 41,341  | 38,704  | 43,887  | 30,148  | 51,550  |
| 321 |      | 1.00 | 143,437 | 138,789 | 148,104 | 108,109 | 173,964 |
| 322 |      | 1.00 | 657     | 334     | 1,080   | 261     | 1,269   |

---

## References

- Clemente FJ, Cardona A, Inchley CE, Peter BM, Jacobs G, Pagani L, Lawson DJ, Antão T, Vicente M, Mitt M et al. 2014. A selective sweep on a deleterious mutation in CPT1A in Arctic populations. *Am J Hum Genet* **95**(5): 584-589.
- Drmanac R, Sparks AB, Callow MJ, Halpern AL, Burns NL, Kermani BG, Carnevali P, Nazarenko I, Nilsen GB, Yeung G et al. 2010. Human genome sequencing using unchained base reads on self-assembling DNA nanoarrays. *Science* **327**(5961): 78-81.
- Fenner JN. 2005. Cross-cultural estimation of the human generation interval for use in genetics-based population divergence studies. *Am J Phys Anthropol* **128**(2): 415-423.
- Lachance J, Vernot B, Elbers CC, Ferwerda B, Froment A, Bodo JM, Lema G, Fu W, Nyambo TB, Rebbeck TR et al. 2012. Evolutionary history and adaptation from high-coverage whole-genome sequences of diverse African hunter-gatherers. *Cell* **150**(3): 457-469.
